# Supplementary material for: “Cation-Stitching Cascade”: exquisite control of terpene cyclization in cyclooctatin biosynthesis
Source: PubMed Central journal article supplement (PMC4683443; doi:10.1038/srep18471), 2015-12-18
Supplement: srep18471-s1.pdf [file srep18471-s1.pdf]

## SUPPORTING INFORMATION

# "Cation-Stitching Cascade": an exquisite control of terpene cyclization in cyclooctatin biosynthesis

Hajime Sato,<sup>1,2</sup> Kazuya Teramoto,<sup>3</sup> Yui Masumoto,<sup>1,2</sup> Noriyuki Tezuka,<sup>1,2</sup> Kenta Sakai,<sup>4</sup> Shota Ueda,<sup>4</sup> Yusuke Totsuka,<sup>4</sup> Tetsuro Shinada,<sup>4</sup> Makoto Nishiyama,<sup>3</sup> Chao Wang,<sup>1,2</sup> Tomohisa Kuzuyama,<sup>\*3</sup> and Masanobu Uchiyama<sup>\*1,2</sup>

<sup>1</sup> Graduate School of Pharmaceutical Sciences, The University of Tokyo, 7-3-1 Hongo, Bunkyo-ku, Tokyo 113-0033, Japan;

<sup>2</sup> Elements Chemistry Laboratory, RIKEN, and RIKEN Center for Sustainable Resource Science (Wako campus), 2-1 Hirosawa, Wako-shi, Saitama-ken 351-0198, Japan.

<sup>3</sup> Biotechnology Research Center, The University of Tokyo, 1-1-1 Yayoi, Bunkyo-ku, Tokyo 113-8657, Japan.

<sup>4</sup> Department of Material Science, Graduate School of Science, Osaka City University, Sugimoto, Sumiyoshi-ku, Osaka 558-8585, Japan.

**E-mail:** utkuz@mail.ecc.u-tokyo.ac.jp (T.K.); uchiyama@mol.f.u-tokyo.ac.jp (M.U.)

---

### Table of Contents

|    |                       |      |
|----|-----------------------|------|
| 1. | Calculation Methods   | S-2  |
| 2. | Energy Profiles       | S-2  |
| 3. | Cartesian Coordinates | S-3  |
| 4. | Experiment Details    | S-16 |
| 5. | Reference             | S-24 |

# 1. Calculation Methods

All calculations were performed with Gaussian 09 program.<sup>[1]</sup> Geometry optimizations were performed in the gas phase at the M062X/6-31G\*\* level,<sup>[2-3]</sup> without any symmetry restrictions, and the nature of the minima was verified by frequency calculations within the harmonic approximation. IRC for all TS was performed with GRRM11<sup>[4]</sup> and/or Reaction Plus<sup>[5-7]</sup> programs based on Gaussian 09. Gibbs free energy used for discussion in this study.

## 2. Energy Profiles

|                          | G(a.u.)     |
|--------------------------|-------------|
| <b>INT1</b>              | -780.891409 |
| <b>TS1-2</b>             | -780.883222 |
| <b>INT2</b>              | -780.899979 |
| <b>TS2-3</b>             | -780.880606 |
| <b>INT3</b>              | -780.918933 |
| <b>TS3-4</b>             | -780.909235 |
| <b>INT4</b>              | -780.919727 |
| <b>TS4-5</b>             | -780.910952 |
| <b>INT5</b>              | -780.932079 |
| <b>TS5-6</b>             | -780.920758 |
| <b>INT6</b>              | -780.934369 |
| <b>TS6-7</b>             | -780.932036 |
| <b>INT7</b>              | -780.937756 |
| <b>TS7-8</b>             | -780.935104 |
| <b>INT8</b>              | -780.941615 |
| <b>TS8-9</b>             | -780.935329 |
| <b>INT9</b>              | -780.937778 |
| <b>TS9-10</b>            | -780.935275 |
| <b>INT10</b>             | -780.937947 |
| <b>TS10-11</b>           | -780.935784 |
| <b>INT11</b>             | -780.954009 |
| <b>TS11-12</b>           | -780.943667 |
| <b>INT12</b>             | -780.960904 |
| <b>1,3-shift-Reverse</b> | -780.924721 |
| <b>1,3-shift-TS</b>      | -780.89807  |
| <b>1,3-shift-Forward</b> | -780.948381 |

# 3. Cartesian Coordinates

## INT1

|   |             |             |             |
|---|-------------|-------------|-------------|
| C | -2.02039648 | 1.56258457  | 0.43101538  |
| C | -2.74658985 | 0.89016243  | 1.33223888  |
| C | -1.76921239 | -1.36514886 | -0.41134891 |
| H | -2.26943497 | 0.61352394  | 2.27538171  |
| H | -0.18736795 | -2.02628163 | -1.73703715 |
| H | -0.94455861 | -0.50966376 | -2.21200792 |
| C | -0.55735673 | 1.85381302  | 0.64829932  |
| H | -0.25327258 | 1.56489069  | 1.65715936  |
| C | 0.37892627  | 1.26371143  | -0.43476969 |
| H | 0.08761430  | 1.69200243  | -1.40028149 |
| H | 1.38917928  | 1.64899258  | -0.24439650 |
| C | 1.99037642  | -2.21056701 | 0.00482020  |
| H | 1.79305361  | -3.09338764 | 0.61852299  |
| H | 1.95850796  | -2.45761578 | -1.05871984 |
| C | 3.44796287  | -1.68701073 | 0.35581792  |
| H | 4.09860198  | -2.53643792 | 0.12729039  |
| H | 3.51261901  | -1.51212755 | 1.43134885  |
| H | 3.94893792  | -0.66799932 | -1.52147665 |
| C | -3.08071757 | -1.20972833 | -0.63553999 |
| H | -1.49560264 | -1.65013900 | 0.60293916  |
| C | -3.99234164 | -1.16916862 | 0.56329362  |
| H | -4.99540954 | -1.53656774 | 0.32678125  |
| H | -3.59080509 | -1.79613360 | 1.36609969  |
| C | -4.10642025 | 0.30295077  | 1.08810532  |
| H | -4.66680530 | 0.89426354  | 0.35893771  |
| H | -4.69945002 | 0.28879611  | 2.00649134  |
| C | -3.71183037 | -0.91985602 | -1.96642654 |
| H | -2.98897134 | -0.74313718 | -2.76563190 |
| H | -4.32807404 | -1.77507097 | -2.26488370 |
| H | -4.38137879 | -0.05581918 | -1.90498502 |
| C | -2.55136290 | 2.04111430  | -0.89543692 |
| H | -2.15987904 | 3.03903073  | -1.12105056 |
| H | -2.24208389 | 1.38378578  | -1.71721557 |
| H | -3.63945796 | 2.10065482  | -0.91778695 |
| C | 4.08944875  | 0.75109950  | -0.00072944 |
| H | -0.39271576 | 2.93774637  | 0.58869375  |
| C | 4.49071494  | 1.84603428  | -0.95253372 |
| H | 3.80895308  | 2.70012384  | -0.86909035 |
| H | 5.48998820  | 2.21825731  | -0.70421401 |
| H | 4.49879937  | 1.50589967  | -1.98945369 |
| C | 4.02175744  | 1.18144305  | 1.44124516  |
| H | 3.79831634  | 0.37330274  | 2.13997034  |
| H | 4.97850390  | 1.61952294  | 1.74257476  |
| H | 3.27148306  | 1.97193668  | 1.56764031  |
| H | 1.32319641  | -0.30166614 | -1.52494380 |
| C | 0.81041036  | -0.84691200 | 1.76099914  |
| H | -0.23939578 | -0.56689899 | 1.89684528  |
| H | 1.10328386  | -1.66442592 | 2.41941685  |
| H | 1.38359900  | 0.05936193  | 2.02240227  |
| C | 3.84281544  | -0.48660644 | -0.45169541 |
| C | 0.58326819  | -0.24654275 | -0.71467165 |
| C | 1.09580321  | -1.10464109 | 0.34480774  |
| C | -0.63416728 | -1.10441003 | -1.34763433 |

## TS1-2

|   |             |             |             |
|---|-------------|-------------|-------------|
| C | -1.92690000 | 1.74336700  | 0.47511300  |
| C | -2.64576700 | 0.90254000  | 1.22497900  |
| C | -1.72984300 | -1.76825100 | -0.14559600 |
| H | -2.11688800 | 0.32149100  | 1.98260300  |
| H | -0.00790800 | -2.82172900 | -0.94927700 |
| H | -0.54250200 | -1.47055900 | -1.93030800 |
| C | -0.41497700 | 1.74846300  | 0.55380600  |
| H | -0.05794000 | 1.30081100  | 1.48312300  |
| C | 0.21841300  | 1.07169800  | -0.69062600 |
| H | -0.45035800 | 1.17564100  | -1.55430100 |
| H | 1.11389100  | 1.64180900  | -0.98255100 |
| C | 2.16456800  | -2.27061500 | -0.05800700 |
| H | 2.00005900  | -3.21196700 | 0.47506500  |
| H | 2.22520600  | -2.49210500 | -1.12944400 |
| C | 3.50207600  | -1.62688100 | 0.38719000  |
| H | 4.27935000  | -2.38669700 | 0.25992200  |
| H | 3.46765100  | -1.39865800 | 1.45554700  |
| H | 4.16209100  | -0.63551600 | -1.45804300 |
| C | -2.86586300 | -1.16441100 | -0.53845400 |
| H | -1.72719400 | -2.25467100 | 0.82574500  |
| C | -3.99803200 | -1.02272200 | 0.45031000  |
| H | -4.95863600 | -1.28053500 | -0.00677200 |
| H | -3.83694100 | -1.70217700 | 1.29224800  |
| C | -4.05445900 | 0.44740600  | 0.98071000  |
| H | -4.56066300 | 1.08273000  | 0.25135600  |
| H | -4.65806100 | 0.46124700  | 1.89236200  |
| C | -3.09171000 | -0.51259600 | -1.86940400 |
| H | -2.21260800 | -0.48753400 | -2.51597300 |
| H | -3.88218800 | -1.05127100 | -2.40313800 |
| H | -3.44624300 | 0.51329700  | -1.73410100 |
| C | -2.49935900 | 2.70343100  | -0.53635200 |
| H | -2.24543200 | 3.72769700  | -0.24155900 |
| H | -2.08354700 | 2.55793000  | -1.54043200 |
| H | -3.58537000 | 2.64803500  | -0.61177400 |
| C | 3.76959000  | 0.87044800  | -0.07536400 |
| H | -0.05284200 | 2.78317000  | 0.55503600  |
| C | 4.13840800  | 1.96616300  | -1.04044500 |
| H | 3.32757600  | 2.69969100  | -1.13212500 |
| H | 5.01031600  | 2.51848500  | -0.67430900 |
| H | 4.37212100  | 1.57795600  | -2.03353700 |
| C | 3.35515400  | 1.35992900  | 1.28702700  |
| H | 3.21799400  | 0.56166400  | 2.01778700  |
| H | 4.10938600  | 2.04624000  | 1.68488900  |
| H | 2.42195400  | 1.93488600  | 1.22166600  |
| H | 1.34579400  | -0.47688100 | -1.65745600 |
| C | 0.56372400  | -1.25068600 | 1.64424800  |
| H | -0.37285300 | -0.71411100 | 1.76168700  |
| H | 0.46033300  | -2.25829700 | 2.05489400  |
| H | 1.33421200  | -0.73304800 | 2.22514000  |
| C | 3.83774700  | -0.41753800 | -0.43953200 |
| C | 0.78646700  | -0.32377400 | -0.73439800 |
| C | 1.02448400  | -1.31370900 | 0.21669400  |
| C | -0.47534800 | -1.83843100 | -0.90589400 |

**INT2**

|   |             |             |             |
|---|-------------|-------------|-------------|
| C | -1.58316156 | 1.90599377  | 0.31034679  |
| C | -2.36541413 | 1.12916254  | 1.06500346  |
| C | -1.67337118 | -1.87995274 | 0.11704276  |
| H | -1.87801561 | 0.52818236  | 1.83517704  |
| H | -0.24761424 | -3.37638168 | -0.36559683 |
| H | -0.41873830 | -2.17455437 | -1.62880454 |
| C | -0.08054264 | 1.70321947  | 0.35780762  |
| H | 0.18770841  | 1.18969798  | 1.28429097  |
| C | 0.28962686  | 0.85352888  | -0.88878916 |
| H | -0.63789466 | 0.40799346  | -1.26739543 |
| H | 0.62964227  | 1.50965188  | -1.69922289 |
| C | 2.14788117  | -2.45447198 | -0.25258058 |
| H | 2.20768888  | -3.32459500 | 0.40605612  |
| H | 2.12099130  | -2.82447824 | -1.28427667 |
| C | 3.33972966  | -1.50373222 | -0.05827114 |
| H | 4.22351929  | -1.81913693 | -0.61621706 |
| H | 3.62855456  | -1.46927563 | 0.99388435  |
| H | 3.22428951  | 0.10433575  | -1.56972746 |
| C | -2.72424265 | -1.21898616 | -0.38558758 |
| H | -1.74051611 | -2.15488058 | 1.16926249  |
| C | -3.83933390 | -0.78182479 | 0.54372964  |
| H | -4.81905335 | -1.04181309 | 0.12796799  |
| H | -3.74051847 | -1.31171295 | 1.49641998  |
| C | -3.79612768 | 0.75179685  | 0.81935171  |
| H | -4.20746003 | 1.29600708  | -0.03436188 |
| H | -4.43796489 | 0.96885929  | 1.67896832  |
| C | -2.86814866 | -0.76777431 | -1.81203223 |
| H | -2.04957617 | -1.09612800 | -2.45594078 |
| H | -3.80149317 | -1.15238393 | -2.23584940 |
| H | -2.92836681 | 0.32733535  | -1.86196342 |
| C | -2.06183646 | 2.84001440  | -0.76882837 |
| H | -1.69243232 | 3.85294132  | -0.57213557 |
| H | -1.68392001 | 2.55282685  | -1.75783833 |
| H | -3.14910047 | 2.89419874  | -0.82499701 |
| C | 3.07354212  | 1.06561424  | 0.23125176  |
| H | 0.45524424  | 2.66144909  | 0.33653157  |
| C | 3.14868206  | 2.36410556  | -0.46941787 |
| H | 2.86073401  | 3.20811118  | 0.15900703  |
| H | 4.21968975  | 2.48786631  | -0.70658768 |
| H | 2.61703031  | 2.36546005  | -1.42217069 |
| C | 3.25482163  | 1.11317836  | 1.69455048  |
| H | 3.47854922  | 0.15821832  | 2.16195329  |
| H | 4.02575267  | 1.85254947  | 1.93855956  |
| H | 2.32381917  | 1.51580481  | 2.12173314  |
| H | 1.28574220  | -0.70748655 | -1.84398173 |
| C | 0.76523328  | -1.38264597 | 1.53161212  |
| H | -0.09204289 | -0.76110631 | 1.78560692  |
| H | 0.62609974  | -2.34962060 | 2.02573195  |
| H | 1.65970364  | -0.92919882 | 1.96438183  |
| C | 2.87567139  | -0.12040981 | -0.55657513 |
| C | 1.22762790  | -0.34205941 | -0.81245222 |
| C | 0.89699957  | -1.60347208 | 0.02237240  |
| C | -0.38608535 | -2.30124895 | -0.54070044 |

**TS2-3**

|   |             |             |             |
|---|-------------|-------------|-------------|
| C | -1.76008954 | 1.70975164  | -0.15818437 |
| C | -2.59840918 | 1.57871756  | 0.87483447  |
| C | 1.19753871  | 0.00655621  | -0.84150248 |
| C | -1.75048911 | -1.30276263 | 0.59460652  |
| C | 0.83833688  | -1.10668495 | 0.18930135  |
| C | -0.52614927 | -1.83416019 | -0.08393172 |
| H | -2.20856677 | 1.76091446  | 1.87811871  |
| H | -0.37676777 | -2.85815488 | 0.28470798  |
| H | -0.66486879 | -1.92737863 | -1.16831909 |
| C | -0.32328134 | 2.13780122  | 0.04056016  |
| H | -0.03239164 | 2.05029149  | 1.09164704  |
| C | 0.70376895  | 1.48231599  | -0.90796106 |
| H | 0.32443312  | 1.62070925  | -1.92382224 |
| H | 1.57942012  | 2.12972455  | -0.87828303 |
| C | 1.95115751  | -2.18388263 | -0.06230082 |
| H | 2.36185759  | -2.51823143 | 0.89619119  |
| H | 1.52629625  | -3.07411417 | -0.52943175 |
| C | 3.03321142  | -1.59600653 | -0.98624267 |
| H | 2.85619103  | -1.89909261 | -2.02093070 |
| H | 4.04525604  | -1.92287960 | -0.73576271 |
| C | 2.84967930  | -0.08150460 | -0.91963173 |
| H | 3.07654639  | 0.46040341  | -1.84657197 |
| C | -3.00705529 | -1.21134786 | 0.14830550  |
| H | -1.59843461 | -0.99117036 | 1.62566549  |
| C | -4.00616412 | -0.51107704 | 1.03852257  |
| H | -5.02220340 | -0.88324614 | 0.87173693  |
| H | -3.76011072 | -0.69944422 | 2.08826813  |
| C | -3.99382433 | 1.03067345  | 0.79753334  |
| H | -4.44953573 | 1.24372998  | -0.17292798 |
| H | -4.63299089 | 1.49935504  | 1.55132814  |
| C | -3.49586062 | -1.64061890 | -1.20634418 |
| H | -2.69076283 | -1.93794749 | -1.88179704 |
| H | -4.17688511 | -2.49271402 | -1.10486722 |
| H | -4.06746176 | -0.83891880 | -1.68711563 |
| C | -2.15832822 | 1.47883496  | -1.59205218 |
| H | -1.79334412 | 2.28762321  | -2.23594658 |
| H | -1.73281581 | 0.53925586  | -1.97115060 |
| H | -3.23742736 | 1.41989803  | -1.72330212 |
| C | 3.56334019  | 0.59072018  | 0.14973032  |
| H | -0.25571112 | 3.20827795  | -0.20201650 |
| C | 3.72945247  | 2.05672759  | 0.17646993  |
| H | 2.91141758  | 2.43598902  | 0.81601841  |
| H | 4.65897520  | 2.34335708  | 0.67515868  |
| H | 3.64397430  | 2.53255990  | -0.79887732 |
| C | 4.26732029  | -0.14637004 | 1.21502354  |
| H | 3.87939688  | -1.14291094 | 1.41051608  |
| H | 5.29367489  | -0.25966712 | 0.81855124  |
| H | 4.36048934  | 0.44181278  | 2.13096278  |
| H | 0.98244851  | -0.43679044 | -1.82092756 |
| C | 0.89729178  | -0.58255788 | 1.62574044  |
| H | 0.08911786  | 0.11969949  | 1.82849329  |
| H | 0.81581421  | -1.40649385 | 2.34204885  |
| H | 1.83855023  | -0.06257640 | 1.83831859  |

**INT3**

|   |             |             |             |
|---|-------------|-------------|-------------|
| C | -1.31107134 | 2.02291818  | 0.45353973  |
| C | -2.42554740 | 1.32688257  | 0.70618206  |
| C | 0.77876539  | -0.04877880 | 0.21211163  |
| C | -1.73989650 | -1.84184454 | 0.38893731  |
| C | 0.62584853  | -1.29920828 | 1.13217769  |
| C | -0.31403266 | -2.32174697 | 0.42340230  |
| H | -2.49734369 | 0.84147124  | 1.68162272  |
| H | -0.25250938 | -3.26540481 | 0.97839666  |
| H | 0.05368473  | -2.53630483 | -0.58636739 |
| C | -0.16989621 | 2.01619016  | 1.44766244  |
| H | -0.49411060 | 1.55310688  | 2.38019118  |
| C | 1.09329180  | 1.30134739  | 0.89142406  |
| H | 1.53556533  | 1.99794169  | 0.16913040  |
| H | 1.83359848  | 1.18453810  | 1.69167080  |
| C | 2.05082816  | -1.85672544 | 1.24914811  |
| H | 2.63753735  | -1.20457274 | 1.90925229  |
| H | 2.06467799  | -2.85631843 | 1.69158173  |
| C | 2.62209709  | -1.82847793 | -0.16788307 |
| H | 2.39174445  | -2.75070742 | -0.70586913 |
| H | 3.70947193  | -1.72335761 | -0.18493398 |
| C | 1.90382391  | -0.67420878 | -0.88866122 |
| H | 1.27309956  | -1.00544716 | -1.71665439 |
| C | -2.37750829 | -1.20076751 | -0.59856558 |
| H | -2.28384104 | -1.96041926 | 1.32507801  |
| C | -3.71172605 | -0.54539950 | -0.32703236 |
| H | -4.43678901 | -0.77823190 | -1.11456091 |
| H | -4.11885377 | -0.92577918 | 0.61509038  |
| C | -3.55886174 | 0.99769623  | -0.22207127 |
| H | -3.39715527 | 1.42258447  | -1.21635172 |
| H | -4.50132797 | 1.41348312  | 0.15010379  |
| C | -1.81147863 | -0.94532546 | -1.97080120 |
| H | -0.90855208 | -1.52631560 | -2.17555938 |
| H | -2.54845250 | -1.20025509 | -2.73885229 |
| H | -1.58058409 | 0.12194703  | -2.10372798 |
| C | -1.05535275 | 2.79585826  | -0.81380311 |
| H | -0.77510418 | 3.82783932  | -0.57450258 |
| H | -0.21933382 | 2.37122132  | -1.38585420 |
| H | -1.92280455 | 2.83289588  | -1.47272810 |
| C | 2.63052383  | 0.49600874  | -1.25200028 |
| H | 0.13334301  | 3.04126694  | 1.69351097  |
| C | 2.15688090  | 1.33550554  | -2.36861802 |
| H | 2.24078207  | 2.40384257  | -2.15085637 |
| H | 2.84910142  | 1.13649102  | -3.20359800 |
| H | 1.15113357  | 1.07094886  | -2.69828779 |
| C | 3.87110155  | 0.88763470  | -0.55484954 |
| H | 4.01735200  | 1.96890839  | -0.54084644 |
| H | 3.94099138  | 0.46317107  | 0.44747785  |
| H | 4.69529241  | 0.45576314  | -1.14663659 |
| H | -0.11448792 | 0.09544029  | -0.39759617 |
| C | 0.08659284  | -0.98884826 | 2.53225422  |
| H | -0.91718840 | -0.56577483 | 2.50399177  |
| H | 0.04041250  | -1.92319930 | 3.10093447  |
| H | 0.74275105  | -0.30487843 | 3.07728609  |

**TS3-4**

|   |             |             |             |
|---|-------------|-------------|-------------|
| C | 0.92741300  | 2.00584700  | -0.88093700 |
| C | 1.92938100  | 1.09470900  | -0.97143700 |
| C | -0.64112700 | -0.55466800 | -0.25854700 |
| C | 1.83861500  | -2.01630600 | 0.22837300  |
| C | -0.65733500 | -2.10484200 | -0.27242400 |
| C | 0.51001500  | -2.59747900 | 0.64380700  |
| H | 1.71947400  | 0.16731700  | -1.49900500 |
| H | 0.53882400  | -3.69273300 | 0.61018700  |
| H | 0.27502000  | -2.32227600 | 1.67698700  |
| C | -0.39039600 | 1.62453700  | -1.37489500 |
| H | -0.97934600 | 2.40100800  | -1.87141000 |
| C | -0.74295100 | 0.19183000  | -1.61110100 |
| H | -1.73290000 | 0.10505800  | -2.06617500 |
| H | -0.03173000 | -0.23045500 | -2.32953000 |
| C | -2.05376300 | -2.46982300 | 0.32550800  |
| H | -2.53735800 | -3.27967200 | -0.22607700 |
| H | -1.94057200 | -2.80963200 | 1.36100000  |
| C | -2.88331800 | -1.17205500 | 0.30339100  |
| H | -3.71872200 | -1.19011800 | 1.00784900  |
| H | -3.29802200 | -0.99891700 | -0.69716400 |
| C | -1.81503400 | -0.12501400 | 0.63954500  |
| H | -1.49110900 | -0.30981600 | 1.67398400  |
| C | 2.48994300  | -0.98875500 | 0.79881600  |
| H | 2.26134400  | -2.41968400 | -0.69271500 |
| C | 3.65754200  | -0.32593300 | 0.09188600  |
| H | 4.53735000  | -0.27047400 | 0.74136600  |
| H | 3.93636100  | -0.91349000 | -0.78838100 |
| C | 3.29399800  | 1.12005100  | -0.36304600 |
| H | 3.32758900  | 1.81684100  | 0.47930000  |
| H | 4.03769900  | 1.46374300  | -1.09294700 |
| C | 2.07803700  | -0.31713600 | 2.08467200  |
| H | 2.94447900  | -0.20130900 | 2.74369100  |
| H | 1.69218600  | 0.69531400  | 1.89487500  |
| H | 1.31416200  | -0.86925100 | 2.63272300  |
| C | 1.07792300  | 3.38389200  | -0.28952800 |
| H | 2.12521200  | 3.64712300  | -0.14367200 |
| H | 0.63502600  | 4.13409200  | -0.95162100 |
| H | 0.56817200  | 3.45766900  | 0.67754900  |
| C | -2.10353500 | 1.37393300  | 0.53328400  |
| H | -1.21176900 | 1.78614700  | -0.18377300 |
| C | -1.84421600 | 2.14937500  | 1.81274600  |
| H | -1.91854200 | 3.22813400  | 1.65859600  |
| H | -2.60305700 | 1.86087400  | 2.54960500  |
| H | -0.86453800 | 1.90509700  | 2.23378300  |
| C | -3.37700900 | 1.77774500  | -0.17886400 |
| H | -3.46480500 | 1.33026700  | -1.17203400 |
| H | -4.22870900 | 1.42175100  | 0.41197700  |
| H | -3.46034100 | 2.86348500  | -0.26492500 |
| H | 0.28500000  | -0.21908200 | 0.19615600  |
| C | -0.50922600 | -2.70629100 | -1.67366700 |
| H | 0.43179900  | -2.41903100 | -2.15427600 |
| H | -0.52550600 | -3.79787900 | -1.61262000 |
| H | -1.33241100 | -2.40178800 | -2.32877800 |

**INT4**

|   |             |             |             |
|---|-------------|-------------|-------------|
| C | 1.22049311  | 1.98113121  | -1.10500381 |
| C | 2.13713152  | 0.94336174  | -1.17583885 |
| C | -0.71676176 | -0.37914461 | -0.10645011 |
| C | 1.84607620  | -1.94269390 | 0.22043998  |
| C | -0.66354337 | -1.95208091 | -0.19375955 |
| C | 0.51230931  | -2.42798187 | 0.71103991  |
| H | 1.83112400  | 0.01415783  | -1.65208753 |
| H | 0.50021848  | -3.52469907 | 0.73107553  |
| H | 0.31890347  | -2.09258637 | 1.73465386  |
| C | -0.12403996 | 1.67561910  | -1.34973031 |
| H | -0.83199412 | 2.50183916  | -1.26179073 |
| C | -0.68030590 | 0.33043780  | -1.52599874 |
| H | -1.67680870 | 0.36021488  | -1.96708419 |
| H | -0.03731799 | -0.26522299 | -2.17590679 |
| C | -2.03782133 | -2.41402800 | 0.38010807  |
| H | -2.44373035 | -3.26037867 | -0.17933656 |
| H | -1.91869973 | -2.73908229 | 1.41989869  |
| C | -2.93699413 | -1.17565407 | 0.33883985  |
| H | -3.80741686 | -1.25719593 | 0.99489738  |
| H | -3.30735375 | -1.00017166 | -0.68018289 |
| C | -1.95968037 | -0.07427717 | 0.75396471  |
| H | -1.63478869 | -0.33151827 | 1.77471641  |
| C | 2.61242315  | -0.96495004 | 0.73520053  |
| H | 2.20184207  | -2.41202768 | -0.69786538 |
| C | 3.81554527  | -0.46460514 | -0.04634515 |
| H | 4.71004272  | -0.40132614 | 0.58061279  |
| H | 4.03728083  | -1.15051354 | -0.86920483 |
| C | 3.51002736  | 0.94234689  | -0.62146593 |
| H | 3.61879584  | 1.72701073  | 0.13286865  |
| H | 4.21465159  | 1.19091462  | -1.43156332 |
| C | 2.34408090  | -0.23740028 | 2.02615106  |
| H | 3.20099037  | -0.34531928 | 2.69928392  |
| H | 2.21059430  | 0.83994092  | 1.86054896  |
| H | 1.46015695  | -0.60391299 | 2.54791239  |
| C | 1.62594404  | 3.36000707  | -0.63977173 |
| H | 2.53112283  | 3.70040166  | -1.14620485 |
| H | 0.83375109  | 4.08253982  | -0.84210641 |
| H | 1.81709680  | 3.36811381  | 0.43808063  |
| C | -2.47843124 | 1.37501570  | 0.83766203  |
| H | -1.59738745 | 2.03965973  | 0.82782304  |
| C | -3.18411160 | 1.59509739  | 2.18072258  |
| H | -3.55214065 | 2.62042329  | 2.26719640  |
| H | -4.04485727 | 0.92480526  | 2.27446317  |
| H | -2.51272963 | 1.40207461  | 3.02159170  |
| C | -3.43090711 | 1.78616212  | -0.29061656 |
| H | -3.00821398 | 1.70054069  | -1.29567049 |
| H | -4.33497531 | 1.17014292  | -0.26710885 |
| H | -3.74339562 | 2.82528724  | -0.15660806 |
| H | 0.17714565  | -0.02761145 | 0.41314971  |
| C | -0.50201653 | -2.53042896 | -1.60291918 |
| H | 0.42989833  | -2.23339332 | -2.09519360 |
| H | -0.49636962 | -3.62242550 | -1.54553980 |
| H | -1.33710581 | -2.24250415 | -2.25027186 |

**TS4-5**

|   |             |             |             |
|---|-------------|-------------|-------------|
| C | 1.79860600  | 1.61370600  | -0.64455700 |
| C | 2.32754500  | 0.35126900  | -1.03820200 |
| C | -1.00495300 | -0.10511700 | -0.02161600 |
| C | 1.88615700  | -1.56989500 | 0.34179900  |
| C | -0.65595400 | -1.64509700 | -0.20619300 |
| C | 0.51864400  | -2.05728100 | 0.71521800  |
| H | 1.68788400  | -0.24323000 | -1.67932900 |
| H | 0.56660200  | -3.15488500 | 0.71245900  |
| H | 0.26663800  | -1.75510900 | 1.73513900  |
| C | 0.45206900  | 1.81516300  | -0.78261600 |
| H | 0.08208300  | 2.79488300  | -0.48011500 |
| C | -0.57868700 | 0.82700400  | -1.21637500 |
| H | -1.44064200 | 1.38321800  | -1.58442000 |
| H | -0.21711500 | 0.23515600  | -2.05834800 |
| C | -1.94179700 | -2.36579200 | 0.26861100  |
| H | -2.02939800 | -3.36593200 | -0.16442900 |
| H | -1.92556000 | -2.48061000 | 1.35964800  |
| C | -3.07237300 | -1.42041900 | -0.10859700 |
| H | -4.01583900 | -1.68621300 | 0.37201800  |
| H | -3.24361200 | -1.41343700 | -1.19353500 |
| C | -2.53323900 | -0.06780100 | 0.36182100  |
| H | -2.55763200 | -0.09534200 | 1.46234100  |
| C | 2.65130000  | -0.67365800 | 1.03654300  |
| H | 2.35891900  | -2.09058300 | -0.49169500 |
| C | 4.03464200  | -0.31133300 | 0.49816400  |
| H | 4.41364200  | 0.56685400  | 1.02306700  |
| H | 4.75654500  | -1.11681400 | 0.65864300  |
| C | 3.79771500  | 0.00691200  | -0.98812300 |
| H | 4.40853400  | 0.83955200  | -1.34821700 |
| H | 3.99870700  | -0.85373400 | -1.62798900 |
| C | 2.18017200  | 0.02125400  | 2.27531500  |
| H | 3.02894300  | 0.30363400  | 2.90259500  |
| H | 1.65835800  | 0.95022900  | 1.99624800  |
| H | 1.48876900  | -0.57772700 | 2.86806800  |
| C | 2.70210200  | 2.69008100  | -0.09137500 |
| H | 3.51973300  | 2.91670400  | -0.78113100 |
| H | 2.14114500  | 3.61140300  | 0.07183100  |
| H | 3.14644100  | 2.40040300  | 0.86510400  |
| C | -3.37060300 | 1.15135900  | -0.04277000 |
| H | -3.32491500 | 1.27680000  | -1.13339300 |
| C | -2.86033700 | 2.42219800  | 0.63980100  |
| H | -3.39886100 | 3.30526000  | 0.28716100  |
| H | -3.01144800 | 2.34969300  | 1.72235200  |
| H | -1.79247800 | 2.59238000  | 0.47421300  |
| C | -4.84429800 | 0.93954700  | 0.31834900  |
| H | -5.29649900 | 0.13192500  | -0.26133700 |
| H | -4.95065000 | 0.69855700  | 1.38211300  |
| H | -5.41783300 | 1.84950200  | 0.12411100  |
| H | -0.44426500 | 0.24208700  | 0.85350300  |
| C | -0.39500100 | -2.10245100 | -1.64782500 |
| H | 0.51474800  | -1.69824100 | -2.10051600 |
| H | -0.29112300 | -3.19109200 | -1.66496600 |
| H | -1.23006300 | -1.84319400 | -2.30542900 |

**INT5**

|   |             |             |             |
|---|-------------|-------------|-------------|
| C | 1.82870196  | 1.59817478  | -0.01625514 |
| C | 2.01565230  | 0.37623074  | -0.88073777 |
| C | -1.30411641 | 0.55108115  | 0.49144327  |
| C | 1.85159565  | -0.91198570 | -0.00586975 |
| C | -0.72571585 | -0.89389898 | 0.46150998  |
| C | 0.71314721  | -1.04718396 | 1.00933404  |
| H | 1.25191398  | 0.37105808  | -1.65702888 |
| H | 0.78727158  | -2.04880154 | 1.45299333  |
| H | 0.87735697  | -0.32559299 | 1.81947246  |
| C | 0.60879433  | 2.12707797  | 0.13129390  |
| H | 0.50691126  | 2.97320886  | 0.81025973  |
| C | -0.67932155 | 1.60414291  | -0.44632103 |
| H | -1.37336032 | 2.44125666  | -0.54803932 |
| H | -0.54617867 | 1.20142012  | -1.45561263 |
| C | -1.69854488 | -1.56874188 | 1.44827523  |
| H | -1.63991053 | -2.66152820 | 1.39994461  |
| H | -1.43068396 | -1.27116745 | 2.46972433  |
| C | -3.08558081 | -1.02608338 | 1.06856157  |
| H | -3.73192071 | -0.94322855 | 1.94448221  |
| H | -3.58132707 | -1.72020770 | 0.38957975  |
| C | -2.85166094 | 0.36220995  | 0.39967270  |
| H | -3.30724474 | 1.12676005  | 1.03869735  |
| C | 3.19957557  | -1.26716461 | 0.40158787  |
| H | 1.75242200  | -1.73426881 | -0.76783737 |
| C | 4.20237445  | -0.62164440 | -0.46163389 |
| H | 4.77365467  | 0.03554500  | 0.21812968  |
| H | 4.94230713  | -1.34333409 | -0.83032787 |
| C | 3.40904963  | 0.17133227  | -1.51148026 |
| H | 3.89529988  | 1.10886573  | -1.78256040 |
| H | 3.31496631  | -0.42530548 | -2.42313597 |
| C | 3.53700303  | -2.13159947 | 1.53554170  |
| H | 4.59209652  | -2.39771352 | 1.57860623  |
| H | 3.25836241  | -1.57655638 | 2.44627452  |
| H | 2.90185225  | -3.02440495 | 1.54698520  |
| C | 2.99834759  | 2.08675414  | 0.79604653  |
| H | 3.88363574  | 2.29478716  | 0.18487472  |
| H | 2.74255326  | 3.00019705  | 1.33479600  |
| H | 3.29260694  | 1.34377719  | 1.55486028  |
| C | -3.46108021 | 0.57977458  | -1.02295192 |
| H | -2.65804758 | 0.50345686  | -1.76845875 |
| C | -4.06520094 | 1.98684580  | -1.12402535 |
| H | -4.37918308 | 2.20905499  | -2.14722628 |
| H | -4.94858632 | 2.05681212  | -0.47966061 |
| H | -3.37146562 | 2.77021789  | -0.80799643 |
| C | -4.54263215 | -0.42957116 | -1.42133256 |
| H | -4.15495210 | -1.44098859 | -1.57303297 |
| H | -5.33174295 | -0.48101613 | -0.66360735 |
| H | -5.00649719 | -0.11952365 | -2.36146956 |
| H | -1.10965213 | 0.90241837  | 1.51601455  |
| C | -0.86147605 | -1.57636433 | -0.90543145 |
| H | -0.32781327 | -1.05464752 | -1.70709348 |
| H | -0.48365400 | -2.60536851 | -0.85683438 |
| H | -1.90791660 | -1.63803138 | -1.21220127 |

**TS5-6**

|   |             |             |             |
|---|-------------|-------------|-------------|
| C | 2.21984600  | -1.65069100 | -0.14927900 |
| C | 2.55084700  | -0.18725600 | -0.40683600 |
| C | -0.66334500 | -0.27534100 | 0.06078800  |
| C | 1.84953700  | 0.89866600  | 0.43844500  |
| C | -0.28274700 | 0.05243300  | 1.54992000  |
| C | 1.17659900  | 0.59159400  | 1.75120700  |
| H | 3.61971000  | -0.08705600 | -0.17675600 |
| H | 1.78825000  | -0.16056300 | 2.25641000  |
| H | 1.15076900  | 1.47624800  | 2.39613200  |
| C | 1.01592200  | -2.24049800 | -0.14582800 |
| H | 1.04986400  | -3.32148400 | -0.01250000 |
| C | -0.39426900 | -1.73153500 | -0.31604200 |
| H | -0.69010700 | -1.91445000 | -1.35607400 |
| H | -1.04369500 | -2.38515200 | 0.27615900  |
| C | -1.33571600 | 1.10731400  | 1.94849200  |
| H | -1.40643400 | 1.22355000  | 3.03428100  |
| H | -1.07435800 | 2.08795900  | 1.52818200  |
| C | -2.61522200 | 0.61077400  | 1.28265700  |
| H | -3.40754400 | 1.36234300  | 1.27172600  |
| H | -3.01049100 | -0.26721900 | 1.80547000  |
| C | -2.13784300 | 0.24764600  | -0.13099900 |
| H | -2.05712400 | 1.20644500  | -0.66920600 |
| C | 1.62174400  | 2.03554800  | -0.37011700 |
| H | 2.69667200  | 1.74740000  | 0.61772300  |
| C | 2.17257600  | 1.81744100  | -1.75251300 |
| H | 1.48724600  | 2.25858200  | -2.48344500 |
| H | 3.11933500  | 2.36326700  | -1.85922000 |
| C | 2.33204400  | 0.29067900  | -1.86264700 |
| H | 1.41359300  | -0.15444900 | -2.25708100 |
| H | 3.15118800  | -0.00309600 | -2.51951200 |
| C | 0.95425900  | 3.29868500  | 0.02763600  |
| H | 0.83209500  | 3.40136500  | 1.10606800  |
| H | 1.47094700  | 4.16629000  | -0.38938900 |
| H | -0.04519400 | 3.26764000  | -0.42789100 |
| C | 3.46355200  | -2.49083700 | 0.03206600  |
| H | 4.01788900  | -2.18227000 | 0.92619900  |
| H | 3.22565300  | -3.55049100 | 0.12915100  |
| H | 4.14282200  | -2.37226100 | -0.82024000 |
| C | -3.08575000 | -0.62108300 | -0.97164200 |
| H | -2.99146400 | -1.66601300 | -0.64758900 |
| C | -2.73206000 | -0.51992700 | -2.46006200 |
| H | -3.29905600 | -1.24263500 | -3.05204400 |
| H | -2.98224200 | 0.48071400  | -2.83051200 |
| H | -1.66831100 | -0.68465500 | -2.65973200 |
| C | -4.54542200 | -0.20196200 | -0.77745700 |
| H | -4.88807200 | -0.36030600 | 0.24779200  |
| H | -4.67717600 | 0.85875200  | -1.02064300 |
| H | -5.19791400 | -0.77672400 | -1.43978800 |
| H | -0.05490200 | 0.33630500  | -0.61482100 |
| C | -0.43870800 | -1.15560600 | 2.48912100  |
| H | 0.27136900  | -1.95035700 | 2.24949900  |
| H | -0.25241300 | -0.83788600 | 3.51972600  |
| H | -1.44596500 | -1.57605900 | 2.45046800  |

**INT6**

|   |             |             |             |
|---|-------------|-------------|-------------|
| C | 2.13236700  | -1.49400600 | -0.73899800 |
| C | 2.39999800  | -0.07102400 | -0.30363100 |
| C | -0.70779500 | -0.30726600 | -0.01597400 |
| C | 1.71979800  | 0.61802300  | 0.79320200  |
| C | -0.35992600 | -0.60624900 | 1.49885000  |
| C | 1.06606100  | -0.04667800 | 1.92146500  |
| H | 3.38776800  | -0.07885200 | 0.23738200  |
| H | 1.69426200  | -0.90207300 | 2.19987600  |
| H | 0.97328500  | 0.62783700  | 2.77611100  |
| C | 0.93908100  | -2.03575000 | -1.01579700 |
| H | 0.98531700  | -3.05048500 | -1.41041400 |
| C | -0.46975500 | -1.50846300 | -0.92986700 |
| H | -0.78640000 | -1.26625300 | -1.95108400 |
| H | -1.11645300 | -2.33942300 | -0.62651400 |
| C | -1.49201100 | 0.09345700  | 2.28115300  |
| H | -1.60300800 | -0.32312900 | 3.28613600  |
| H | -1.29672300 | 1.16672600  | 2.39052000  |
| C | -2.71087000 | -0.09867200 | 1.38063900  |
| H | -3.54977500 | 0.53372000  | 1.67822700  |
| H | -3.06002500 | -1.13787500 | 1.40153500  |
| C | -2.16266300 | 0.27500500  | -0.00194000 |
| H | -2.05561800 | 1.37171700  | 0.01320700  |
| C | 1.91192200  | 2.08848700  | 0.66997100  |
| H | 2.34972200  | 2.43774000  | 1.61589600  |
| C | 2.82863600  | 2.27615300  | -0.55864400 |
| H | 2.60007300  | 3.19770300  | -1.09619200 |
| H | 3.87624600  | 2.32311900  | -0.24589100 |
| C | 2.58731000  | 1.01157700  | -1.39126800 |
| H | 1.66814800  | 1.07544300  | -1.98504000 |
| H | 3.40635900  | 0.76981100  | -2.06926900 |
| C | 0.55857000  | 2.83091800  | 0.51481800  |
| H | -0.14986400 | 2.56511000  | 1.30156600  |
| H | 0.76047300  | 3.90097500  | 0.57781200  |
| H | 0.10604600  | 2.62169200  | -0.45763300 |
| C | 3.40607900  | -2.27111900 | -0.97530000 |
| H | 3.95018300  | -2.42964000 | -0.03694400 |
| H | 3.20274500  | -3.24715900 | -1.41658800 |
| H | 4.07890500  | -1.72927100 | -1.64983100 |
| C | -3.04799300 | -0.04428500 | -1.21312800 |
| H | -3.00725000 | -1.12389500 | -1.40998900 |
| C | -2.55169300 | 0.71544200  | -2.44861100 |
| H | -3.09273900 | 0.40793500  | -3.34681500 |
| H | -2.71848600 | 1.79015800  | -2.31294000 |
| H | -1.48205700 | 0.57176400  | -2.63804200 |
| C | -4.50845300 | 0.32507700  | -0.94247100 |
| H | -4.94259300 | -0.27853800 | -0.14173900 |
| H | -4.59340400 | 1.38046500  | -0.65887500 |
| H | -5.11325400 | 0.17312800  | -1.84004500 |
| H | -0.06576600 | 0.49850400  | -0.39798900 |
| C | -0.39928700 | -2.09838100 | 1.86038200  |
| H | 0.34579100  | -2.68046700 | 1.31480200  |
| H | -0.20451900 | -2.21270000 | 2.93070700  |
| H | -1.38364100 | -2.52725900 | 1.65896200  |

**TS6-7**

|   |             |             |             |
|---|-------------|-------------|-------------|
| C | -1.99644500 | 1.74661400  | -0.25960000 |
| C | -2.27797600 | 0.28631400  | -0.31508300 |
| C | 0.78964600  | 0.24123600  | 0.04615500  |
| C | -1.82710200 | -0.71601000 | 0.57613900  |
| C | 0.43759100  | 0.01335800  | 1.56298400  |
| C | -1.04101100 | -0.45683900 | 1.81756400  |
| H | -3.05209000 | -0.00871500 | 0.61856700  |
| H | -1.56333900 | 0.33340100  | 2.36911700  |
| H | -1.05371400 | -1.35305000 | 2.44425400  |
| C | -0.76771300 | 2.28777800  | -0.29918100 |
| H | -0.76453500 | 3.37718900  | -0.34203800 |
| C | 0.61372200  | 1.69674000  | -0.38875600 |
| H | 0.93343400  | 1.82088600  | -1.43054300 |
| H | 1.28222200  | 2.34871600  | 0.18342200  |
| C | 1.46217100  | -1.04884900 | 2.01275200  |
| H | 1.57056400  | -1.07231900 | 3.10119300  |
| H | 1.15000000  | -2.05119000 | 1.69357200  |
| C | 2.73403600  | -0.65905200 | 1.26473700  |
| H | 3.49121200  | -1.44557500 | 1.28422400  |
| H | 3.18787000  | 0.23764400  | 1.70251500  |
| C | 2.21887000  | -0.38369700 | -0.15498700 |
| H | 2.05390700  | -1.37497500 | -0.60683700 |
| C | -2.21947900 | -2.08299500 | 0.06838700  |
| H | -2.59908900 | -2.69512800 | 0.89197600  |
| C | -3.28518500 | -1.78537700 | -1.00661900 |
| H | -3.29064100 | -2.53679900 | -1.79711400 |
| H | -4.28157300 | -1.77148200 | -0.55262800 |
| C | -2.93305800 | -0.38039400 | -1.51969400 |
| H | -2.17306200 | -0.40131400 | -2.31009200 |
| H | -3.78771400 | 0.17866600  | -1.90143500 |
| C | -0.97206900 | -2.77270800 | -0.51948700 |
| H | -0.15626000 | -2.83451300 | 0.20428700  |
| H | -1.24656200 | -3.78900600 | -0.80786800 |
| H | -0.60741900 | -2.25435000 | -1.41098600 |
| C | -3.23980600 | 2.60774600  | -0.28390000 |
| H | -3.88841100 | 2.39738900  | 0.57414800  |
| H | -2.97526200 | 3.66505800  | -0.25108800 |
| H | -3.83083900 | 2.43835600  | -1.18949800 |
| C | 3.17842700  | 0.35560000  | -1.09883000 |
| H | 3.17610100  | 1.42415800  | -0.84330300 |
| C | 2.74045000  | 0.18188100  | -2.55780700 |
| H | 3.33196300  | 0.81225400  | -3.22643200 |
| H | 2.88994400  | -0.85922200 | -2.86497300 |
| H | 1.68388300  | 0.41850600  | -2.72110000 |
| C | 4.61306000  | -0.15592200 | -0.94395300 |
| H | 5.01857500  | 0.04786700  | 0.04987800  |
| H | 4.65610300  | -1.23776200 | -1.11440400 |
| H | 5.26904200  | 0.32134300  | -1.67650200 |
| H | 0.11935500  | -0.35248200 | -0.58278500 |
| C | 0.65815100  | 1.26952300  | 2.42335700  |
| H | -0.02088500 | 2.08150300  | 2.14956600  |
| H | 0.47773400  | 1.02325700  | 3.47411500  |
| H | 1.68180300  | 1.64201900  | 2.34372200  |



**INT7**

|   |             |             |             |
|---|-------------|-------------|-------------|
| C | -1.96898800 | 1.72514000  | 0.20801200  |
| C | -2.19036600 | 0.37036400  | -0.21716600 |
| C | 0.77438700  | 0.24009800  | 0.19586900  |
| C | -1.94682500 | -0.87417100 | 0.52153700  |
| C | 0.48129200  | -0.48886500 | 1.54921700  |
| C | -0.99410000 | -0.94932300 | 1.71437900  |
| H | -2.97009800 | -0.81915200 | 0.99088600  |
| H | -1.45111200 | -0.34807800 | 2.50789100  |
| H | -1.01876300 | -1.98332200 | 2.07633300  |
| C | -0.75808800 | 2.27080500  | 0.50267600  |
| H | -0.79394900 | 3.33359100  | 0.74534900  |
| C | 0.62538700  | 1.75015600  | 0.30026600  |
| H | 0.96552600  | 2.24306800  | -0.62266100 |
| H | 1.26972100  | 2.17490900  | 1.07750600  |
| C | 1.49593300  | -1.65362700 | 1.55429800  |
| H | 1.66812700  | -2.03178500 | 2.56633200  |
| H | 1.12937600  | -2.49482400 | 0.95474500  |
| C | 2.73893200  | -1.06145300 | 0.89450800  |
| H | 3.46350300  | -1.82149200 | 0.59468000  |
| H | 3.25429600  | -0.37385100 | 1.57578600  |
| C | 2.15718100  | -0.30750700 | -0.30968800 |
| H | 1.92231800  | -1.07800600 | -1.06092500 |
| C | -2.13892300 | -2.02574200 | -0.50276500 |
| H | -2.45892800 | -2.92019300 | 0.03817600  |
| C | -3.27511000 | -1.46153300 | -1.37446600 |
| H | -3.32181700 | -1.92194600 | -2.36235400 |
| H | -4.24425000 | -1.61150200 | -0.88804400 |
| C | -2.96489000 | 0.04249700  | -1.44961600 |
| H | -2.25780300 | 0.26046900  | -2.26902100 |
| H | -3.81915500 | 0.70317500  | -1.61688500 |
| C | -0.89802600 | -2.36294600 | -1.32779500 |
| H | -0.04477500 | -2.61742700 | -0.69601500 |
| H | -1.11042100 | -3.22611700 | -1.96291500 |
| H | -0.59613300 | -1.53978900 | -1.98536400 |
| C | -3.19183100 | 2.63384100  | 0.11537100  |
| H | -4.09321600 | 2.14465400  | 0.49208700  |
| H | -3.02050100 | 3.52879700  | 0.71490200  |
| H | -3.37599700 | 2.94772000  | -0.91595100 |
| C | 3.08633500  | 0.69566200  | -1.00663000 |
| H | 3.15067700  | 1.60605700  | -0.39360100 |
| C | 2.54681400  | 1.05409000  | -2.39671700 |
| H | 3.11893100  | 1.86892100  | -2.84742000 |
| H | 2.63049800  | 0.18444600  | -3.05779200 |
| H | 1.49159500  | 1.34913000  | -2.38755300 |
| C | 4.50306500  | 0.13350900  | -1.14946400 |
| H | 4.97890800  | -0.03227600 | -0.18021200 |
| H | 4.48468700  | -0.82089400 | -1.68777600 |
| H | 5.13227600  | 0.82343500  | -1.71770800 |
| H | 0.03580500  | -0.08217600 | -0.55164200 |
| C | 0.79605300  | 0.39218900  | 2.77347000  |
| H | 0.13527700  | 1.26254800  | 2.83772000  |
| H | 0.64646900  | -0.19541900 | 3.68392300  |
| H | 1.82954100  | 0.74822400  | 2.77575100  |

**TS7-8**

|   |             |             |             |
|---|-------------|-------------|-------------|
| C | 0.36391800  | 0.93823800  | 1.42429600  |
| C | -1.87039800 | -0.03983800 | -0.48463500 |
| C | -1.07967500 | 0.56456400  | 1.89808400  |
| C | -1.93360400 | -0.30550000 | 0.97021700  |
| H | -1.62965900 | 1.49596000  | 2.06129200  |
| H | -0.09289400 | -0.24340600 | -0.38070200 |
| H | -1.03352100 | 0.06838000  | 2.87374000  |
| H | -2.98910600 | 0.02985600  | 1.11212000  |
| C | -0.79197000 | 2.04097200  | -1.32388000 |
| H | -0.94210900 | 2.99010700  | -1.83426000 |
| C | -1.87827500 | 1.28335100  | -1.10682200 |
| C | 0.61751300  | 1.61036400  | -1.07008600 |
| H | 1.67752200  | 0.83194200  | 3.18123100  |
| H | 1.19892400  | -0.74511700 | 2.56346800  |
| C | 1.48174800  | 0.26914600  | 2.26444800  |
| H | 3.46389000  | -0.47156700 | 1.67913200  |
| H | 3.12616800  | 1.18349400  | 1.16118200  |
| C | 2.02812500  | -0.31607800 | 0.02506900  |
| H | 1.75764000  | -1.36349500 | 0.22649200  |
| C | -2.01673900 | -1.84773300 | 1.10633900  |
| C | 4.25364100  | -0.95820800 | -0.97029000 |
| H | 4.14134600  | -1.96388000 | -0.54939200 |
| H | 4.82588700  | -1.04676500 | -1.89715500 |
| H | 4.84165600  | -0.35991900 | -0.27050600 |
| C | 2.88405800  | -0.33199000 | -1.24423300 |
| H | -2.55812000 | -2.09151500 | 2.02445100  |
| C | -2.31910500 | -1.26076000 | -1.22485100 |
| H | -3.01839500 | -1.02406300 | -2.03037500 |
| H | -1.42334600 | -1.66463000 | -1.72230700 |
| C | 2.67744100  | 0.19400100  | 1.31761700  |
| H | -2.71955500 | -3.26935400 | -0.42615500 |
| H | -3.90307900 | -2.03891800 | 0.02930000  |
| C | -0.66718400 | -2.55987500 | 1.12525500  |
| H | -0.11575300 | -2.42786700 | 0.18750400  |
| H | -0.03591200 | -2.21141500 | 1.94482200  |
| H | -0.82168500 | -3.63269800 | 1.26196900  |
| C | -2.83758900 | -2.22317400 | -0.13994600 |
| H | 1.03887100  | 1.29829100  | -2.03262600 |
| H | 1.21712000  | 2.47291600  | -0.76211100 |
| C | 2.17162100  | -1.11543400 | -2.35267200 |
| H | 2.72567500  | -1.06736500 | -3.29324600 |
| H | 1.15592600  | -0.75005700 | -2.54824500 |
| H | 2.09369900  | -2.17116700 | -2.06774200 |
| H | 3.05225900  | 0.70155800  | -1.57648700 |
| C | 0.69684100  | 0.49513400  | -0.04246600 |
| C | -3.25948800 | 1.69007800  | -1.60438700 |
| H | -3.25561600 | 2.76071800  | -1.81276700 |
| H | -3.52667900 | 1.16363800  | -2.52441400 |
| H | -4.03731300 | 1.49331200  | -0.86078600 |
| C | 0.50681600  | 2.45948500  | 1.62889900  |
| H | 0.28601800  | 2.69457200  | 2.67372600  |
| H | 1.52344600  | 2.80631100  | 1.42387700  |
| H | -0.18948700 | 3.03169400  | 1.00925000  |

**INT8**

|   |             |             |             |
|---|-------------|-------------|-------------|
| C | 0.32499600  | -1.12269100 | 1.38854200  |
| C | -1.44584700 | 0.54574500  | -0.22905400 |
| C | -1.18452200 | -1.50611700 | 1.24750700  |
| C | -1.97366400 | -0.84223900 | 0.10599300  |
| H | -1.67565300 | -1.22890100 | 2.18396800  |
| H | -0.21146400 | 0.38306000  | -0.18924000 |
| H | -1.26226400 | -2.59616200 | 1.17337800  |
| H | -2.97813900 | -0.64354300 | 0.50905300  |
| C | -0.69019800 | 2.02033900  | 1.57982600  |
| H | -0.85959700 | 2.79926000  | 2.31694900  |
| C | -1.67777000 | 1.62465000  | 0.77375400  |
| C | 0.70837200  | 1.49088500  | 1.41761300  |
| H | 1.53903700  | -2.94285800 | 1.52157900  |
| H | 0.87164000  | -2.65328200 | -0.08287400 |
| C | 1.30583600  | -2.16413100 | 0.79142200  |
| H | 3.17491200  | -1.89081400 | -0.33259800 |
| H | 3.12764200  | -1.03363600 | 1.21327900  |
| C | 1.87478200  | -0.12680200 | -0.32032500 |
| H | 1.41803400  | -0.51243800 | -1.24734700 |
| C | -2.22387500 | -1.53355900 | -1.25606500 |
| C | 4.01397400  | 0.52085000  | -1.47523300 |
| H | 3.71963900  | -0.08424800 | -2.34016600 |
| H | 4.61128200  | 1.35839000  | -1.84307300 |
| H | 4.65369200  | -0.08821600 | -0.83265900 |
| C | 2.78051400  | 1.03811300  | -0.73058300 |
| H | -3.05832500 | -2.23299400 | -1.14747000 |
| C | -1.68792900 | 0.79979800  | -1.71862500 |
| H | -2.07104300 | 1.80559400  | -1.90287700 |
| H | -0.73849600 | 0.72201600  | -2.26355800 |
| C | 2.52212200  | -1.35034300 | 0.35489300  |
| H | -2.58938400 | -0.55277600 | -3.20070800 |
| H | -3.67217600 | -0.04629900 | -1.90040000 |
| C | -1.04554800 | -2.29796400 | -1.84987600 |
| H | -0.15724400 | -1.66829800 | -1.97402800 |
| H | -0.77377800 | -3.15692500 | -1.23186300 |
| H | -1.31174500 | -2.68086500 | -2.83813300 |
| C | -2.64197400 | -0.33696800 | -2.13163100 |
| H | 1.32169400  | 2.24830400  | 0.92453900  |
| H | 1.16786300  | 1.32097400  | 2.39719800  |
| C | 2.01273600  | 2.02363600  | -1.61887600 |
| H | 2.61232200  | 2.91199800  | -1.83009600 |
| H | 1.06747900  | 2.36112900  | -1.17568000 |
| H | 1.77796600  | 1.54970900  | -2.57922700 |
| H | 3.13052900  | 1.55060200  | 0.17525300  |
| C | 0.72696900  | 0.18560100  | 0.65977000  |
| C | -3.07059100 | 2.20010100  | 0.80965600  |
| H | -3.13943700 | 2.97684600  | 1.57168400  |
| H | -3.34305200 | 2.64222700  | -0.15334000 |
| H | -3.81407900 | 1.42978600  | 1.03888200  |
| C | 0.61120400  | -1.00948900 | 2.90015600  |
| H | 0.34681400  | -1.95914100 | 3.37205400  |
| H | 1.66867100  | -0.81889300 | 3.10614300  |
| H | 0.00914000  | -0.22609600 | 3.36818600  |

**TS8-9**

|   |             |             |             |
|---|-------------|-------------|-------------|
| C | 0.33138600  | -1.26303300 | 0.99317800  |
| C | -1.38407700 | 0.72920200  | -0.29655800 |
| C | -1.11133500 | -1.09757000 | 1.51391500  |
| C | -2.08973500 | -0.30432900 | 0.61640100  |
| H | -1.05052700 | -0.59114400 | 2.48325300  |
| H | -0.34393400 | 0.35404900  | -0.49083500 |
| H | -1.50739600 | -2.09717700 | 1.72581900  |
| H | -2.70134800 | 0.28827300  | 1.30858200  |
| C | -0.11104300 | 2.25045400  | 1.16003200  |
| H | 0.01308900  | 3.17311200  | 1.71870200  |
| C | 0.99077300  | 0.00804100  | 0.57674100  |
| C | 0.56237100  | -2.17048100 | -0.22954800 |
| H | 0.46576600  | -3.22993400 | 0.01870800  |
| H | -0.17841700 | -1.93822100 | -0.99927300 |
| C | 1.95324100  | -1.77057800 | -0.72354000 |
| H | 2.13983600  | -2.06038200 | -1.75810900 |
| H | 2.73597800  | -2.22741300 | -0.11173500 |
| C | 1.96251800  | -0.23171600 | -0.55376600 |
| H | 1.48449100  | 0.19081500  | -1.45421200 |
| C | 3.32643100  | 0.49726800  | -0.43374600 |
| C | 4.39161500  | -0.21376600 | -1.27305500 |
| H | 4.08546900  | -0.26545100 | -2.32311100 |
| H | 5.32715700  | 0.34876500  | -1.22793600 |
| H | 4.59642800  | -1.22728700 | -0.92307800 |
| C | -3.12284900 | -1.05147000 | -0.26974400 |
| H | -3.98504800 | -1.29815100 | 0.35809100  |
| C | -2.14983400 | 0.70377700  | -1.63556900 |
| H | -2.25628200 | 1.69283300  | -2.08405800 |
| H | -1.60365100 | 0.08665300  | -2.35765300 |
| C | -3.49342000 | 0.03819100  | -1.29170000 |
| H | -3.99967400 | -0.36232300 | -2.17350100 |
| H | -4.16266500 | 0.77406400  | -0.83274400 |
| C | -2.68259200 | -2.33945700 | -0.96543100 |
| H | -2.00912700 | -2.15107800 | -1.80709700 |
| H | -2.19304400 | -3.04082000 | -0.28300500 |
| H | -3.56128900 | -2.84486700 | -1.37342900 |
| C | 0.97886700  | 1.22049500  | 1.43597400  |
| H | 1.95360900  | 1.71142200  | 1.39227800  |
| H | 0.82463800  | 0.88275100  | 2.47021200  |
| C | 3.20434100  | 1.95313300  | -0.89826800 |
| H | 3.08113500  | 1.97892900  | -1.98644900 |
| H | 2.34864700  | 2.48157600  | -0.46723900 |
| H | 4.10857900  | 2.51476500  | -0.65362200 |
| H | 3.64647500  | 0.46567700  | 0.61725600  |
| C | -1.17789600 | 2.05581800  | 0.38508500  |
| C | -2.24743400 | 3.10469700  | 0.24120800  |
| H | -2.06122200 | 3.95130600  | 0.90281600  |
| H | -2.30113900 | 3.47934600  | -0.78474600 |
| H | -3.23024300 | 2.68721100  | 0.48643000  |
| C | 1.21645200  | -1.77795400 | 2.18030100  |
| H | 0.90935100  | -2.80693300 | 2.38287900  |
| H | 2.28475900  | -1.78091400 | 1.95475800  |
| H | 1.05291700  | -1.18378400 | 3.08058300  |

**INT9**

|   |             |             |             |
|---|-------------|-------------|-------------|
| C | 0.34076300  | -1.33416500 | 0.84397900  |
| C | -1.48593700 | 0.73048600  | -0.37147100 |
| C | -1.07596500 | -1.17208000 | 1.42076600  |
| C | -2.08566100 | -0.28747100 | 0.64683900  |
| H | -0.97202400 | -0.77728600 | 2.43674600  |
| H | -0.60288200 | 0.28862400  | -0.84496600 |
| H | -1.48553400 | -2.18141700 | 1.54514600  |
| H | -2.59060400 | 0.32216800  | 1.40671500  |
| C | 0.02410500  | 2.12169500  | 1.10339700  |
| H | 0.23078500  | 3.06821900  | 1.59474600  |
| C | 1.11357500  | -0.10529600 | 0.64545000  |
| C | 0.54461900  | -2.12071100 | -0.46587000 |
| H | 0.43560100  | -3.19714000 | -0.31447900 |
| H | -0.20534200 | -1.81230900 | -1.19876300 |
| C | 1.94496400  | -1.70314300 | -0.92933500 |
| H | 2.09527400  | -1.82736600 | -2.00189800 |
| H | 2.71971700  | -2.28634100 | -0.42381500 |
| C | 2.03893400  | -0.21647900 | -0.50730800 |
| H | 1.48792100  | 0.36728200  | -1.27476300 |
| C | 3.42959000  | 0.45795000  | -0.36791800 |
| C | 4.44184000  | -0.18561100 | -1.31909300 |
| H | 4.10730000  | -0.09746500 | -2.35783300 |
| H | 5.40027900  | 0.33181400  | -1.23491800 |
| H | 4.61466200  | -1.24105000 | -1.10005900 |
| C | -3.22938700 | -1.01110700 | -0.10056100 |
| H | -3.95553700 | -1.37559200 | 0.63441900  |
| C | -2.57163100 | 0.86364800  | -1.47901800 |
| H | -2.78199000 | 1.89656500  | -1.75520900 |
| H | -2.22004100 | 0.36905100  | -2.38854600 |
| C | -3.81210000 | 0.13885000  | -0.93289800 |
| H | -4.48069400 | -0.20432300 | -1.72625200 |
| H | -4.38622500 | 0.81130300  | -0.28543800 |
| C | -2.81807400 | -2.18609200 | -0.98658300 |
| H | -2.21411900 | -1.86518500 | -1.84181500 |
| H | -2.25609500 | -2.94887800 | -0.43826800 |
| H | -3.70974200 | -2.67131500 | -1.39107700 |
| C | 1.01810300  | 1.04149700  | 1.55598100  |
| H | 2.00149700  | 1.50675000  | 1.66536500  |
| H | 0.68805800  | 0.69322500  | 2.54227800  |
| C | 3.34552300  | 1.96070500  | -0.65622000 |
| H | 3.14624500  | 2.11945000  | -1.72166800 |
| H | 2.55324300  | 2.47044100  | -0.10116400 |
| H | 4.29323700  | 2.44902200  | -0.41947800 |
| H | 3.77990700  | 0.29960600  | 0.66190300  |
| C | -1.05244400 | 2.01841800  | 0.31699000  |
| C | -1.93800200 | 3.22924400  | 0.16535400  |
| H | -1.64899100 | 4.02196200  | 0.85622400  |
| H | -1.89236400 | 3.63086300  | -0.85111900 |
| H | -2.98306200 | 2.96590500  | 0.36231200  |
| C | 1.24670800  | -2.00122900 | 1.96363800  |
| H | 0.86887700  | -3.02153900 | 2.06805700  |
| H | 2.30569300  | -2.05598300 | 1.70349900  |
| H | 1.13981300  | -1.48372000 | 2.91739700  |

**TS9-10**

|   |             |             |             |
|---|-------------|-------------|-------------|
| C | 0.32558100  | -1.51170600 | 0.59202800  |
| C | -1.44833400 | 0.73452900  | -0.38383600 |
| C | -1.11154600 | -1.46260000 | 1.12900500  |
| C | -2.02011800 | -0.28582000 | 0.67245700  |
| H | -1.07812400 | -1.47215700 | 2.22288300  |
| H | -0.64526300 | 0.27187600  | -0.96757800 |
| H | -1.55779900 | -2.42135000 | 0.84870400  |
| H | -2.22842800 | 0.31390100  | 1.56579800  |
| C | 0.16540100  | 1.95742500  | 1.13483500  |
| H | 0.52027400  | 2.88570400  | 1.57208700  |
| C | 1.09353200  | -0.27298100 | 0.62226900  |
| C | 0.55353500  | -2.08506700 | -0.81891100 |
| H | 0.47693100  | -3.17485700 | -0.82619800 |
| H | -0.21188800 | -1.69897100 | -1.50029500 |
| C | 1.94767000  | -1.57099200 | -1.20028200 |
| H | 2.09602600  | -1.49039300 | -2.27730900 |
| H | 2.72395800  | -2.24019100 | -0.81846900 |
| C | 2.05564200  | -0.19148400 | -0.50311900 |
| H | 1.55024100  | 0.55317300  | -1.15323100 |
| C | 3.47108900  | 0.37512500  | -0.20383700 |
| C | 4.45113300  | -0.04058700 | -1.30534000 |
| H | 4.11804300  | 0.33464900  | -2.27868200 |
| H | 5.43304300  | 0.39235700  | -1.10161500 |
| H | 4.57525700  | -1.12251600 | -1.37686600 |
| C | -3.40404500 | -0.72384100 | 0.12202200  |
| H | -4.06730100 | -0.97844200 | 0.95551300  |
| C | -2.62942000 | 0.99392800  | -1.35756100 |
| H | -2.68425100 | 2.02277000  | -1.71097600 |
| H | -2.50653700 | 0.36902800  | -2.24635500 |
| C | -3.87479700 | 0.55085600  | -0.58743500 |
| H | -4.74102600 | 0.38673200  | -1.23265600 |
| H | -4.15082900 | 1.31013900  | 0.15443200  |
| C | -3.35862000 | -1.91292000 | -0.84217200 |
| H | -2.58671200 | -1.79509300 | -1.61095600 |
| H | -3.17634200 | -2.86091100 | -0.33022300 |
| H | -4.31824300 | -2.01202800 | -1.35583500 |
| C | 0.89939300  | 0.72451500  | 1.67975000  |
| H | 1.87652600  | 1.04996500  | 2.05135500  |
| H | 0.33088800  | 0.29434800  | 2.51118500  |
| C | 3.46945700  | 1.90228700  | -0.09135500 |
| H | 3.19988200  | 2.34623100  | -1.05579300 |
| H | 2.77209000  | 2.29229700  | 0.65238000  |
| H | 4.46811200  | 2.25840200  | 0.17095800  |
| H | 3.81233900  | -0.06270200 | 0.74520300  |
| C | -0.86323100 | 1.98508500  | 0.27851000  |
| C | -1.48332300 | 3.32473100  | -0.02587100 |
| H | -1.04078200 | 4.11066700  | 0.58724300  |
| H | -1.34607600 | 3.59568000  | -1.07724500 |
| H | -2.56109100 | 3.30727600  | 0.16511200  |
| C | 1.21820400  | -2.33729200 | 1.61521000  |
| H | 0.77721500  | -3.33788400 | 1.62258100  |
| H | 2.26350300  | -2.42498400 | 1.31418900  |
| H | 1.16315900  | -1.92185100 | 2.62246100  |

**INT10**

|   |             |             |             |
|---|-------------|-------------|-------------|
| C | 0.35114800  | -1.61640600 | 0.25933700  |
| C | -1.51659200 | 0.70953100  | -0.51828400 |
| C | -1.17931700 | -1.69130800 | 0.46911200  |
| C | -1.94330200 | -0.36121900 | 0.54892400  |
| H | -1.41010200 | -2.28367400 | 1.36098300  |
| H | -0.80690000 | 0.27988900  | -1.24105200 |
| H | -1.55345000 | -2.27274900 | -0.37943600 |
| H | -1.77473200 | 0.08242800  | 1.53331900  |
| C | 0.15841700  | 1.81120900  | 1.03539700  |
| H | 0.61261500  | 2.71860700  | 1.42018700  |
| C | 1.08389700  | -0.37951400 | 0.52752000  |
| C | 0.84599100  | -2.06949100 | -1.12748900 |
| H | 0.78068200  | -3.15391200 | -1.24325500 |
| H | 0.20944800  | -1.61753600 | -1.89676300 |
| C | 2.26924800  | -1.52398600 | -1.21439100 |
| H | 2.61234200  | -1.37640400 | -2.23840700 |
| H | 2.98039600  | -2.19848800 | -0.72707800 |
| C | 2.20060700  | -0.18979700 | -0.43557400 |
| H | 1.73182500  | 0.55545000  | -1.11617000 |
| C | 3.54001700  | 0.40891100  | 0.06462700  |
| C | 4.64008600  | 0.15469800  | -0.97268400 |
| H | 4.38786500  | 0.63227700  | -1.92562700 |
| H | 5.57948100  | 0.58810500  | -0.62324500 |
| H | 4.81372300  | -0.90718500 | -1.15497200 |
| C | -3.49243200 | -0.51775000 | 0.42959600  |
| H | -3.91782900 | -0.61731600 | 1.43336500  |
| C | -2.82811800 | 1.04557400  | -1.26219400 |
| H | -2.84301500 | 2.04204900  | -1.70334100 |
| H | -2.95929500 | 0.33791300  | -2.08583600 |
| C | -3.91127600 | 0.81511300  | -0.20996400 |
| H | -4.92098500 | 0.78501400  | -0.62653200 |
| H | -3.88247400 | 1.61733400  | 0.53829600  |
| C | -3.97325700 | -1.71070500 | -0.39983800 |
| H | -3.56559000 | -1.70753100 | -1.41631000 |
| H | -3.71196100 | -2.66577700 | 0.06379800  |
| H | -5.06224200 | -1.68058600 | -0.48370300 |
| C | 0.75562900  | 0.52803700  | 1.63436700  |
| H | 1.67662600  | 0.79887800  | 2.15945500  |
| H | 0.07456500  | 0.05431800  | 2.34472400  |
| C | 3.46790700  | 1.91362800  | 0.34164400  |
| H | 3.14765100  | 2.45108600  | -0.55755300 |
| H | 2.79022400  | 2.18607400  | 1.15117100  |
| H | 4.45901200  | 2.28351800  | 0.61358900  |
| H | 3.81175400  | -0.11922400 | 0.99032500  |
| C | -0.82121500 | 1.91281800  | 0.12518100  |
| C | -1.23724600 | 3.29588100  | -0.30351500 |
| H | -0.65278400 | 4.06117100  | 0.20856400  |
| H | -1.10293300 | 3.42572900  | -1.38247100 |
| H | -2.29550400 | 3.47237800  | -0.08834600 |
| C | 1.09687000  | -2.47605300 | 1.37427000  |
| H | 0.81699000  | -3.51085600 | 1.16033100  |
| H | 2.18718000  | -2.40866700 | 1.34501400  |
| H | 0.74504200  | -2.20733600 | 2.37072300  |

**TS10-11**

|   |             |             |             |
|---|-------------|-------------|-------------|
| C | 0.34988400  | -1.55823100 | 0.15345500  |
| C | -1.70549600 | 0.74313700  | -0.51883500 |
| C | -1.18002000 | -1.66315600 | 0.35344800  |
| C | -1.98643400 | -0.37322400 | 0.53841700  |
| H | -1.39810200 | -2.33271800 | 1.19257800  |
| H | -1.17718900 | 0.32037100  | -1.38804100 |
| H | -1.54973100 | -2.17714700 | -0.53980900 |
| H | -1.78048700 | 0.05600300  | 1.52225300  |
| C | 0.19833700  | 1.76071700  | 0.87252500  |
| H | 0.80064900  | 2.64467400  | 1.05806900  |
| C | 1.10053500  | -0.34945800 | 0.49726100  |
| C | 0.86209600  | -1.94972300 | -1.24387500 |
| H | 0.75917500  | -3.02225100 | -1.42537200 |
| H | 0.26437400  | -1.42741600 | -1.99972100 |
| C | 2.30701500  | -1.45673700 | -1.26069800 |
| H | 2.68657700  | -1.27201700 | -2.26579700 |
| H | 2.97453000  | -2.18577600 | -0.79091100 |
| C | 2.26741300  | -0.15891700 | -0.41926400 |
| H | 1.88607200  | 0.63899100  | -1.08680500 |
| C | 3.61142600  | 0.33012900  | 0.17806500  |
| C | 4.74155500  | 0.08952000  | -0.83006700 |
| H | 4.55362600  | 0.64270400  | -1.75668900 |
| H | 5.68603500  | 0.44804500  | -0.41552100 |
| H | 4.86942700  | -0.96516300 | -1.07933900 |
| C | -3.52340900 | -0.61225500 | 0.52943500  |
| H | -3.85039000 | -0.89258200 | 1.53649500  |
| C | -3.11682600 | 1.19814600  | -0.98828200 |
| H | -3.18469200 | 2.25825000  | -1.22682400 |
| H | -3.37903900 | 0.65881400  | -1.90213100 |
| C | -4.05034900 | 0.77564700  | 0.14582600  |
| H | -5.10280600 | 0.76502400  | -0.14755900 |
| H | -3.94548900 | 1.46447100  | 0.99294700  |
| C | -4.00612900 | -1.69027700 | -0.44385100 |
| H | -3.64030800 | -1.52762100 | -1.46340200 |
| H | -3.69531200 | -2.69134500 | -0.13332600 |
| H | -5.09815600 | -1.68919800 | -0.48246900 |
| C | 0.73074000  | 0.52156300  | 1.61333800  |
| H | 1.60697200  | 0.82011700  | 2.19118400  |
| H | 0.00338200  | 0.05729500  | 2.27770800  |
| C | 3.60568100  | 1.81536000  | 0.55518500  |
| H | 3.33756900  | 2.42783000  | -0.31278000 |
| H | 2.92505000  | 2.06824900  | 1.36952300  |
| H | 4.60592200  | 2.11616700  | 0.87474400  |
| H | 3.81655700  | -0.27119300 | 1.07577500  |
| C | -0.81152100 | 1.87187300  | -0.00979500 |
| C | -1.03688300 | 3.23962300  | -0.60618400 |
| H | -0.22453100 | 3.92372200  | -0.35848900 |
| H | -1.12139700 | 3.17782900  | -1.69599700 |
| H | -1.96940700 | 3.67657200  | -0.23679600 |
| C | 1.08327600  | -2.46469700 | 1.24314900  |
| H | 0.82564300  | -3.49081000 | 0.96723700  |
| H | 2.17275100  | -2.38285000 | 1.25340500  |
| H | 0.69738100  | -2.25128200 | 2.24036500  |

**INT11**

|   |             |             |             |
|---|-------------|-------------|-------------|
| C | 0.35322400  | -1.44915500 | -0.01891600 |
| C | -2.10828500 | 0.87371800  | -0.27137500 |
| C | -1.12264000 | -1.45735700 | -0.44922300 |
| C | -2.03914500 | -0.52501800 | 0.33433600  |
| H | -1.46471300 | -2.49451300 | -0.34941500 |
| H | -2.54053100 | 0.76209000  | -1.27864300 |
| H | -1.19513600 | -1.21691900 | -1.51816000 |
| H | -1.70107400 | -0.45094600 | 1.37462400  |
| C | 0.40079200  | 1.41252400  | -0.05656300 |
| H | 1.16886000  | 2.09757800  | -0.39741100 |
| C | 1.07197600  | -0.09450300 | 0.21711200  |
| C | 1.24068400  | -2.10128500 | -1.09386800 |
| H | 1.11585100  | -3.18682200 | -1.11753100 |
| H | 0.96353600  | -1.71178100 | -2.08122800 |
| C | 2.65371700  | -1.65516400 | -0.74322600 |
| H | 3.36182000  | -1.79875600 | -1.56084900 |
| H | 3.03419200  | -2.21105200 | 0.12016900  |
| C | 2.49610700  | -0.16047900 | -0.39551400 |
| H | 2.46177500  | 0.37890600  | -1.35372300 |
| C | 3.64903900  | 0.43401400  | 0.44180600  |
| C | 4.99820400  | -0.08842600 | -0.06727500 |
| H | 5.13879500  | 0.17366000  | -1.12193300 |
| H | 5.81366300  | 0.36752400  | 0.49882900  |
| H | 5.09158800  | -1.17118500 | 0.03038800  |
| C | -3.54019300 | -0.89134400 | 0.42201400  |
| H | -3.67441800 | -1.66336600 | 1.18579700  |
| C | -3.19333200 | 1.58414800  | 0.58172200  |
| H | -2.73923800 | 1.95511500  | 1.50653000  |
| H | -3.64340400 | 2.43466400  | 0.06608800  |
| C | -4.20405600 | 0.44154500  | 0.87011300  |
| H | -5.13722400 | 0.60583000  | 0.32579100  |
| H | -4.45297800 | 0.42302000  | 1.93292400  |
| C | -4.12820300 | -1.41682000 | -0.88879900 |
| H | -4.05103200 | -0.68923800 | -1.70425900 |
| H | -3.64110400 | -2.34027300 | -1.21288000 |
| H | -5.19070700 | -1.63486200 | -0.75619700 |
| C | 0.73783400  | 0.75492600  | 1.32850900  |
| H | 1.51036200  | 1.32854400  | 1.82971300  |
| H | -0.11708400 | 0.51446800  | 1.94713500  |
| C | 3.69893700  | 1.96828900  | 0.41188000  |
| H | 3.79363600  | 2.32096800  | -0.62168800 |
| H | 2.83278700  | 2.46510600  | 0.85712900  |
| H | 4.57572600  | 2.32438800  | 0.95771600  |
| H | 3.52105500  | 0.09398900  | 1.48017500  |
| C | -0.88278800 | 1.66928100  | -0.51181300 |
| C | -1.07456000 | 2.90597200  | -1.32864400 |
| H | -0.16366300 | 3.21066800  | -1.84563800 |
| H | -1.89870000 | 2.80723700  | -2.03699600 |
| H | -1.34164200 | 3.71372800  | -0.63191400 |
| C | 0.49294800  | -2.22476000 | 1.30839100  |
| H | 0.24985700  | -3.27752500 | 1.14181700  |
| H | 1.50568100  | -2.17096700 | 1.71645100  |
| H | -0.18810200 | -1.83991200 | 2.07319700  |

**TS11-12**

|   |             |             |             |
|---|-------------|-------------|-------------|
| C | 0.37302100  | -1.42744400 | 0.07588700  |
| C | -2.07649300 | 0.85233200  | -0.23948700 |
| C | -1.10075000 | -1.54964700 | -0.33792400 |
| C | -2.04913000 | -0.56616500 | 0.34104600  |
| H | -1.41281700 | -2.57463400 | -0.10065000 |
| H | -2.42085900 | 0.77420500  | -1.28285700 |
| H | -1.18240000 | -1.44639700 | -1.42819700 |
| H | -1.77825400 | -0.47260000 | 1.40356000  |
| C | 0.42226700  | 1.05662900  | -0.89786900 |
| H | 1.12711700  | 1.75000600  | -1.35769800 |
| C | 1.02647600  | -0.05927400 | -0.21581900 |
| C | 1.28572600  | -2.32539700 | -0.78571800 |
| H | 1.15033300  | -3.38273800 | -0.54448500 |
| H | 1.03536600  | -2.18794500 | -1.84490100 |
| C | 2.69441700  | -1.80804700 | -0.50148000 |
| H | 3.42547400  | -2.12988800 | -1.24496500 |
| H | 3.04255500  | -2.17280800 | 0.46839100  |
| C | 2.54241500  | -0.27062500 | -0.49152000 |
| H | 2.71927800  | 0.07958600  | -1.51868800 |
| C | 3.52895900  | 0.49377400  | 0.41874300  |
| C | 4.93120300  | -0.11985300 | 0.33558000  |
| H | 5.28960700  | -0.11544600 | -0.69962800 |
| H | 5.63330200  | 0.46776300  | 0.93173300  |
| H | 4.96354300  | -1.14684100 | 0.70258100  |
| C | -3.54989600 | -0.93897100 | 0.35022800  |
| H | -3.72185000 | -1.69689800 | 1.12085500  |
| C | -3.18854200 | 1.51685400  | 0.58152700  |
| H | -2.79101500 | 1.80740100  | 1.56263700  |
| H | -3.59166400 | 2.41687400  | 0.11260600  |
| C | -4.25001400 | 0.39821200  | 0.72714400  |
| H | -5.09517900 | 0.58192500  | 0.05856800  |
| H | -4.64994100 | 0.37277000  | 1.74236500  |
| C | -4.04934500 | -1.49658600 | -0.98295200 |
| H | -3.89956400 | -0.78999500 | -1.80686600 |
| H | -3.55251700 | -2.43448800 | -1.24614300 |
| H | -5.12166200 | -1.69813000 | -0.92272300 |
| C | 0.45280500  | 1.17998600  | 0.71082300  |
| H | 1.10996200  | 1.94656200  | 1.09903100  |
| H | -0.16819600 | 0.66238400  | 1.43152400  |
| C | 3.64128100  | 1.97495800  | 0.03400400  |
| H | 4.06246000  | 2.06517000  | -0.97331500 |
| H | 2.69366900  | 2.52253200  | 0.03878500  |
| H | 4.31301300  | 2.49806000  | 0.71860100  |
| H | 3.17593000  | 0.40964700  | 1.45752500  |
| C | -0.78071500 | 1.63163500  | -0.38246700 |
| C | -0.94691400 | 3.11990800  | -0.58943000 |
| H | 0.00674700  | 3.61827400  | -0.77675800 |
| H | -1.60768400 | 3.29319600  | -1.44363600 |
| H | -1.41454700 | 3.57385200  | 0.28659900  |
| C | 0.56453700  | -1.80340800 | 1.55627300  |
| H | 0.36614100  | -2.87055500 | 1.68644800  |
| H | 1.58054300  | -1.60529100 | 1.90500900  |
| H | -0.11473300 | -1.26877600 | 2.22515500  |

**INT12**

|   |             |             |             |
|---|-------------|-------------|-------------|
| C | 0.47140500  | -1.38947000 | 0.19344600  |
| C | -2.06395900 | 0.73839900  | -0.37653700 |
| C | -1.01458900 | -1.58206500 | -0.14576500 |
| C | -2.01767200 | -0.58177000 | 0.40381300  |
| H | -1.26938700 | -2.58886500 | 0.21074900  |
| H | -2.11287700 | 0.49357400  | -1.44528700 |
| H | -1.11485800 | -1.61320600 | -1.23764100 |
| H | -1.80366900 | -0.37147300 | 1.46165800  |
| C | 0.60698900  | 1.21762200  | -0.18509400 |
| H | 1.27348900  | 1.95811600  | -0.60899900 |
| C | 1.12234800  | -0.08021100 | -0.15993300 |
| C | 1.31852700  | -2.39211600 | -0.63062400 |
| H | 1.24022100  | -3.40128200 | -0.21839900 |
| H | 0.93097800  | -2.42317900 | -1.65470600 |
| C | 2.73784300  | -1.83515300 | -0.61877000 |
| H | 3.32021000  | -2.15588200 | -1.48334600 |
| H | 3.27843300  | -2.16591400 | 0.27418500  |
| C | 2.55685900  | -0.30349400 | -0.57415300 |
| H | 2.64294900  | 0.13431100  | -1.58309800 |
| C | 3.65801000  | 0.38006900  | 0.30516500  |
| C | 5.02218300  | 0.04641000  | -0.30927100 |
| H | 5.11024500  | 0.49309600  | -1.30553800 |
| H | 5.82021600  | 0.45712800  | 0.31324100  |
| H | 5.19197300  | -1.02794800 | -0.39971800 |
| C | -3.48929000 | -1.05416700 | 0.36185300  |
| H | -3.65594700 | -1.80356300 | 1.14317400  |
| C | -3.40892300 | 1.38981100  | 0.05514700  |
| H | -3.23069700 | 2.17797400  | 0.79452800  |
| H | -3.90309500 | 1.85992600  | -0.79820800 |
| C | -4.25258000 | 0.24568600  | 0.67072900  |
| H | -5.27014500 | 0.22464000  | 0.27407800  |
| H | -4.33167600 | 0.38394800  | 1.75247100  |
| C | -3.90782900 | -1.65470800 | -0.98168200 |
| H | -3.79726300 | -0.93988700 | -1.80434100 |
| H | -3.33367200 | -2.55138500 | -1.23075100 |
| H | -4.96131100 | -1.94183000 | -0.94404100 |
| C | -0.20844500 | 1.80215700  | 1.04863800  |
| H | 0.22415800  | 2.74516300  | 1.37013900  |
| H | -0.41725200 | 1.09127700  | 1.83788100  |
| C | 3.54384700  | 1.89264000  | 0.48814900  |
| H | 3.51743100  | 2.41199600  | -0.47680300 |
| H | 2.67291800  | 2.18829400  | 1.07667000  |
| H | 4.42631500  | 2.25255900  | 1.02248000  |
| H | 3.59972500  | -0.09147600 | 1.29550000  |
| C | -0.92042500 | 1.71572900  | -0.20540500 |
| C | -1.03561700 | 2.96513800  | -1.05817000 |
| H | -0.19121500 | 3.64234600  | -0.91077500 |
| H | -1.09958000 | 2.70284400  | -2.11684500 |
| H | -1.94758900 | 3.50122400  | -0.78300400 |
| C | 0.74400200  | -1.61488100 | 1.70659200  |
| H | 0.44081200  | -2.63716400 | 1.94892100  |
| H | 1.80168100  | -1.50691800 | 1.95939900  |
| H | 0.17234800  | -0.93220500 | 2.33765400  |

**1,3-shift-Forward**

|   |             |             |             |
|---|-------------|-------------|-------------|
| C | 1.32283400  | 2.15697100  | -0.10381700 |
| C | 2.11512900  | 0.99980000  | 0.07345100  |
| C | -1.08710100 | 0.08364800  | 0.20646300  |
| C | 1.95870500  | -0.37984800 | -0.48152300 |
| C | -0.41723700 | -1.31300800 | 0.12760200  |
| C | 1.07718500  | -1.25744000 | 0.47439800  |
| H | 3.89559400  | -0.32448600 | -1.39260100 |
| H | 1.47748500  | -2.27460500 | 0.43006000  |
| H | 1.19574500  | -0.92169700 | 1.51238900  |
| C | 0.07018400  | 2.13095100  | -0.68688200 |
| H | -0.39000800 | 3.11256600  | -0.81325500 |
| C | -0.78310500 | 0.97456900  | -1.04476100 |
| H | -1.69198700 | 1.33904600  | -1.51855300 |
| H | -0.27243600 | 0.36966900  | -1.80232700 |
| C | -1.21028700 | -2.07531400 | 1.20294100  |
| H | -1.03493100 | -3.15430100 | 1.17082800  |
| H | -0.91838100 | -1.71730900 | 2.19897200  |
| C | -2.65747900 | -1.67970900 | 0.90896600  |
| H | -3.33369500 | -1.89956000 | 1.73757700  |
| H | -3.02504000 | -2.23605200 | 0.04078200  |
| C | -2.59380800 | -0.16502500 | 0.60664600  |
| H | -2.74777700 | 0.36044900  | 1.55874400  |
| C | 3.43635200  | -0.86816800 | -0.55534600 |
| H | 1.50325300  | -0.36553800 | -1.47381700 |
| C | 4.03321000  | -0.31504600 | 0.74229500  |
| H | 3.72319500  | -0.92877500 | 1.59495100  |
| H | 5.12363800  | -0.28478800 | 0.73321200  |
| C | 3.40748500  | 1.07946900  | 0.81971200  |
| H | 3.26575000  | 1.49885100  | 1.82367900  |
| H | 4.02708200  | 1.82221500  | 0.28924100  |
| C | 3.64467500  | -2.35760200 | -0.79341000 |
| H | 3.03865500  | -2.71807400 | -1.63012900 |
| H | 4.69230000  | -2.54669600 | -1.03780900 |
| H | 3.40567300  | -2.95506800 | 0.08970700  |
| C | 1.86889200  | 3.48313000  | 0.38630000  |
| H | 2.83011200  | 3.71938400  | -0.07858200 |
| H | 1.17890700  | 4.29527000  | 0.15625000  |
| H | 2.01761400  | 3.47293400  | 1.46979000  |
| C | -3.68468900 | 0.36116300  | -0.34138200 |
| H | -3.41388500 | 0.10173200  | -1.37651100 |
| C | -3.83274100 | 1.88314100  | -0.20947900 |
| H | -4.47843800 | 2.28957000  | -0.99213500 |
| H | -4.29156500 | 2.12042300  | 0.75614200  |
| H | -2.87966100 | 2.42139300  | -0.24420800 |
| C | -5.04440600 | -0.27916300 | -0.04307200 |
| H | -5.05207700 | -1.35413700 | -0.23312900 |
| H | -5.32058300 | -0.11675800 | 1.00464700  |
| H | -5.82090000 | 0.17429400  | -0.66455800 |
| H | -0.62982600 | 0.58206600  | 1.06863500  |
| C | -0.62763300 | -2.00782200 | -1.22885800 |
| H | 0.06077100  | -1.66922300 | -2.00865500 |
| H | -0.47074900 | -3.08514300 | -1.12031800 |
| H | -1.64082100 | -1.85583300 | -1.61047400 |

**1,3-shift-TS**

|   |             |             |             |
|---|-------------|-------------|-------------|
| C | 1.47051000  | 1.96136000  | -0.23707500 |
| C | 2.04479300  | 0.68399600  | 0.26678800  |
| C | -0.99956900 | -0.07354700 | 0.03782100  |
| C | 1.84311200  | -0.68150500 | -0.40680500 |
| C | -0.53944900 | -1.55029500 | -0.18546300 |
| C | 0.93595300  | -1.73757800 | 0.20897300  |
| H | 3.23459100  | 0.77862000  | -0.14599500 |
| H | 1.28148200  | -2.72716100 | -0.11572200 |
| H | 1.01890200  | -1.71756700 | 1.30058900  |
| C | 0.27066300  | 2.00269500  | -0.84266800 |
| H | -0.07239700 | 2.99885700  | -1.12051100 |
| C | -0.67507100 | 0.87233700  | -1.15391100 |
| H | -1.58698500 | 1.31066300  | -1.55722400 |
| H | -0.25970600 | 0.30190000  | -1.99051200 |
| C | -1.47540500 | -2.33115100 | 0.75316800  |
| H | -1.46651400 | -3.40745200 | 0.55833100  |
| H | -1.16478700 | -2.17749000 | 1.79552900  |
| C | -2.83057900 | -1.66806300 | 0.52815200  |
| H | -3.56339400 | -1.92950900 | 1.29444600  |
| H | -3.25095400 | -1.97509300 | -0.43675900 |
| C | -2.50115100 | -0.16332900 | 0.53013000  |
| H | -2.49516500 | 0.15414200  | 1.58263600  |
| C | 3.30933600  | -0.64901300 | -0.10858500 |
| H | 1.67715800  | -0.55492300 | -1.47832500 |
| C | 3.50857100  | -0.67622800 | 1.40122100  |
| H | 3.29124900  | -1.67069600 | 1.80025900  |
| H | 4.52192900  | -0.39631200 | 1.69272600  |
| C | 2.45838900  | 0.41304600  | 1.72736100  |
| H | 1.61045300  | 0.09178100  | 2.33458500  |
| H | 2.90823600  | 1.28900900  | 2.19576500  |
| C | 4.36455000  | -0.92178400 | -1.12927700 |
| H | 4.07693300  | -0.57015900 | -2.12169200 |
| H | 5.33478100  | -0.51454100 | -0.84346500 |
| H | 4.44926700  | -2.01580400 | -1.17751000 |
| C | 2.27324300  | 3.20429100  | 0.05509400  |
| H | 3.26862400  | 3.15554900  | -0.40196700 |
| H | 1.77037600  | 4.08810100  | -0.33863900 |
| H | 2.41221600  | 3.35345900  | 1.13056700  |
| C | -3.54189000 | 0.72519200  | -0.16498000 |
| H | -3.45609700 | 0.58950000  | -1.25336400 |
| C | -3.32844300 | 2.20069100  | 0.19251500  |
| H | -3.96966100 | 2.85126800  | -0.40799800 |
| H | -3.58562300 | 2.36143000  | 1.24511000  |
| H | -2.29306300 | 2.53137000  | 0.06285700  |
| C | -4.96469000 | 0.32168200  | 0.23442000  |
| H | -5.21964300 | -0.68554100 | -0.10250600 |
| H | -5.08095400 | 0.35595500  | 1.32361300  |
| H | -5.69214800 | 1.01301300  | -0.19903300 |
| H | -0.43036300 | 0.30119000  | 0.89889500  |
| C | -0.75915800 | -2.04027400 | -1.62718600 |
| H | 0.01740700  | -1.70180100 | -2.32060700 |
| H | -0.75090900 | -3.13385000 | -1.65129100 |
| H | -1.71753400 | -1.70304900 | -2.03095500 |

**1,3-shift-Reverse**

|   |             |             |             |
|---|-------------|-------------|-------------|
| C | 1.77751900  | 2.13330900  | -0.07908000 |
| C | 2.55177000  | 0.88869000  | -0.45807500 |
| C | -1.11698300 | 0.46397800  | 0.46152100  |
| C | 1.80821200  | -0.43891500 | -0.68208500 |
| C | -0.53465900 | -0.96554500 | 0.41507200  |
| C | 0.99433800  | -0.96247500 | 0.63314300  |
| H | 3.06655700  | 1.10559000  | -1.40761100 |
| H | 1.28179200  | -1.97825900 | 0.94731700  |
| H | 1.27464800  | -0.29085400 | 1.44756700  |
| C | 0.46016900  | 2.33110300  | -0.20131900 |
| H | 0.11021200  | 3.31164700  | 0.11817500  |
| C | -0.64859100 | 1.41272700  | -0.66340900 |
| H | -1.47905000 | 2.04417000  | -0.98378000 |
| H | -0.36567600 | 0.85322100  | -1.56068000 |
| C | -1.22702100 | -1.57959000 | 1.64603800  |
| H | -1.15574200 | -2.67193500 | 1.66433500  |
| H | -0.75455600 | -1.19992300 | 2.55957100  |
| C | -2.68100400 | -1.07347900 | 1.53231600  |
| H | -3.11212500 | -0.90650400 | 2.52103100  |
| H | -3.30166100 | -1.83128300 | 1.05327000  |
| C | -2.64078900 | 0.24883000  | 0.70034700  |
| H | -2.98871400 | 1.06116600  | 1.34726400  |
| C | 2.76981200  | -1.48356100 | -0.50481800 |
| H | 1.16436800  | -0.53158900 | -1.55203400 |
| C | 3.95286900  | -0.97959500 | 0.23575000  |
| H | 4.25119600  | -1.62433900 | 1.06849400  |
| H | 4.76887800  | -1.05859700 | -0.50434200 |
| C | 3.64268100  | 0.48673700  | 0.57014500  |
| H | 3.26255900  | 0.57338400  | 1.59181100  |
| H | 4.52840300  | 1.11823600  | 0.50124800  |
| C | 2.67882600  | -2.84598100 | -1.06032200 |
| H | 1.67622500  | -3.09282900 | -1.40819000 |
| H | 3.34856200  | -2.84688500 | -1.93394000 |
| H | 3.06161700  | -3.60275600 | -0.37180600 |
| C | 2.66889500  | 3.25429000  | 0.40312600  |
| H | 3.46985900  | 3.45489000  | -0.31830800 |
| H | 2.10095400  | 4.17542200  | 0.53673700  |
| H | 3.14935300  | 3.01453700  | 1.35774100  |
| C | -3.51824400 | 0.32259600  | -0.58806600 |
| H | -2.86926200 | 0.18213400  | -1.46422500 |
| C | -4.15807600 | 1.71333000  | -0.69524400 |
| H | -4.65877800 | 1.84573200  | -1.65777500 |
| H | -4.90837200 | 1.83659700  | 0.09355200  |
| H | -3.43181400 | 2.52253700  | -0.57709400 |
| C | -4.63285600 | -0.72437400 | -0.66965500 |
| H | -4.26028000 | -1.74519900 | -0.79496800 |
| H | -5.25832100 | -0.70229800 | 0.22911900  |
| H | -5.27750700 | -0.51106000 | -1.52634200 |
| H | -0.73470500 | 0.88767200  | 1.40041800  |
| C | -0.94142800 | -1.77069900 | -0.82318200 |
| H | -0.67304700 | -1.29844600 | -1.77309000 |
| H | -0.49447800 | -2.77104900 | -0.79206200 |
| H | -2.02372700 | -1.91138900 | -0.84463100 |

## 4. Experiment Details

### General Information

All reagents and solvents were purchased from either Aldrich Chemical Company, Inc., Kanto Kagaku Co., Inc., Merck & Co., Inc., Nacalai Tesque Company, Ltd., or Tokyo Kasei Kogyo Co., Ltd., and used without further purification unless otherwise indicated. Dichloromethane (CH<sub>2</sub>Cl<sub>2</sub>) was distilled from phosphoric pentoxide (P<sub>2</sub>O<sub>5</sub>). Tetrahydrofuran (THF), *N,N*-dimethylformamide (DMF), and diethyl ether (Et<sub>2</sub>O) of anhydrous grade were used. All reactions were performed under argon. FTIR spectra were measured on a JASCO FT/IR-6200 infrared spectrophotometer. <sup>1</sup>H NMR spectra were recorded on an either Bruker AVANCE 300 (300 MHz) or spectrometer. Chemical shifts of <sup>1</sup>H NMR were reported in parts per million (ppm, δ) relative to CHCl<sub>3</sub> (δ = 7.26) in CDCl<sub>3</sub>. <sup>13</sup>C NMR spectra were recorded on an either Bruker AVANCE 300 (75 MHz), JEOL JNM-LA 400 (100 MHz), spectrometer. Chemical shifts of <sup>13</sup>C NMR were reported in ppm (δ) relative to CHCl<sub>3</sub> (δ = 77.0) in CDCl<sub>3</sub>. Low resolution mass spectra (LRMS) and high resolution mass spectra (HRMS) were obtained on a JEOL JMS-AX500 using either fast atom bombardment ionization (FAB) or electroionizaion (EI) method. All reactions were monitored by thin layer chromatography (TLC), which was performed with precoated plates (silica gel 60 F-254, 0.25 mm thickness, manufactured by Merck). TLC visualization was accompanied using UV lamp (254 nm) or a charring solution (ethanoic phosphomolybdic acid). Daiso IR-60 1002W (40/63 mm) was used for flash column chromatography on silica gel.

### (2*E*)-Ethyl-4-[[*t*-buthyldiphenylsilyl]oxy]-3-*d*-2-methylbuta-2-enoate (**SI-3**)

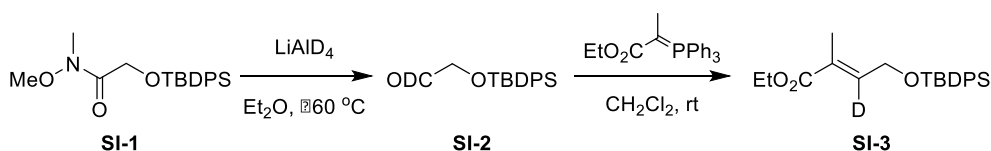

To a suspension of LiAlD<sub>4</sub> (587 mg, 14.0 mmol) in Et<sub>2</sub>O (140 mL) was slowly added a solution of **SI-1**<sup>[8]</sup> (5.00 g, 14.0 mmol) in Et<sub>2</sub>O at -60 °C. The mixture was stirred for 30 min at -60 °C, quenched with 1*N* NaOH (100 mL), filtered, and extracted with Et<sub>2</sub>O (x3). The combined organic layers were washed with brine, dried over anhydrous MgSO<sub>4</sub>, and filtered. The filtrate was concentrated under reduced pressure to give the crude **SI-2**, which was subjected to the next reaction without further purification.

To a solution of **SI-2** (4.19 g) in CH<sub>2</sub>Cl<sub>2</sub> (140 mL) was added ethyl 2-(triphenylphosphoranylidene)propionate (6.16 g, 17 mmol) at room temperature. After stirred for 1 h, the mixture was concentrated under reduced pressure. The residue was purified by flash column chromatography on silica gel to give **SI-3** (3.38 g, 63%, 2 steps from **SI-1**).

FTIR (neat) 3072, 2958, 2933, 2858, 1713, 1428, 1302, 1279, 1200, 1166, 1113, 1064 cm<sup>-1</sup>.

<sup>1</sup>H NMR (300 MHz, CDCl<sub>3</sub>) δ 7.74-7.65 (m, 4 H), 7.49-7.36 (m, 6 H), 4.37 (s, 2 H), 4.21 (q, *J* = 7.1 Hz, 2 H), 1.66 (s, 3 H) 1.32 (t, *J* = 7.1 Hz, 3 H), 1.08 (s, 9 H), <sup>13</sup>C NMR (75 MHz, CDCl<sub>3</sub>) δ 167.6, 140.3 (t, *J* = 24.5 Hz), 135.5, 133.2, 129.7, 127.7, 127.4, 61.2, 60.5, 26.7, 19.1, 14.2, 12.5.



**(2E)-4-[[*t*-Buthyldiphenylsilyl]oxy]-3-*d*-2-methylbuta-2-en-1-ol (SI-4)**

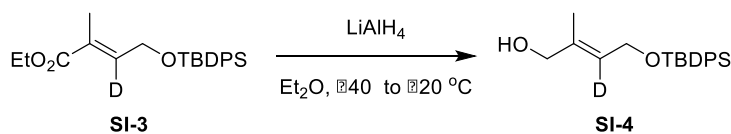

To a suspension of LiAlH<sub>4</sub> (592 mg, 15.6 mmol) in Et<sub>2</sub>O (150 mL) was slowly added a solution of **SI-3** (3.99 g, 10.4 mmol) in Et<sub>2</sub>O at -40 °C. The mixture was stirred for 1 h at -20 °C, quenched with H<sub>2</sub>O (100 mL), acidified with 1N HCl (100 mL), and extracted with Et<sub>2</sub>O (x3). The combined organic layers were washed with brine, dried over anhydrous MgSO<sub>4</sub>, and filtered. The filtrate was concentrated under reduced pressure. The residue was purified by flash column chromatography on silica gel to give **SI-4** (2.91 g, 82%).

FTIR (neat) 3371, 2931, 2858, 1473, 1428, 1112, 1075, 1008 cm<sup>-1</sup>

<sup>1</sup>H NMR (300 MHz, CDCl<sub>3</sub>) δ 7.84-7.65 (m, 4 H), 7.49-7.36 (m, 6 H), 4.30 (s, 2 H), 3.97 (s, 2 H), 1.50 (s, 3 H), 1.07 (s, 9 H), <sup>13</sup>C NMR (75 MHz, CDCl<sub>3</sub>) δ 136.5, 135.9, 134.2, 130.0, 128.0, 124.7 (t, *J* = 23.7 Hz), 68.3, 61.1, 27.2, 19.5, 14.1.

**(2E,6E,10E)-2-*d*-3,7,11,15-Tetramethyl-5-(phenylsulfonyl)hexadeca-2,6,10,14-tetraen-1-ol (SI-7)**

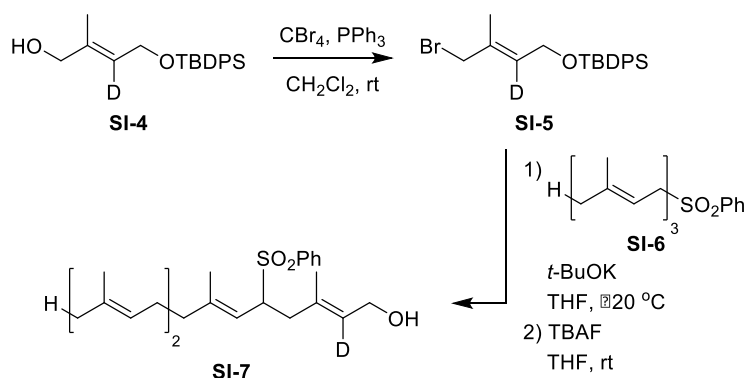

To a solution of **SI-4** (202 mg, 0.59 mmol) in CH<sub>2</sub>Cl<sub>2</sub> (6 mL) was added CBr<sub>4</sub> (255 mg, 0.77 mmol) and PPh<sub>3</sub> (202 mg, 0.77 mmol) at 0 °C. The mixture was stirred at room temperature for 30 min and filtered to remove insoluble materials. The filtrate was concentrated under reduced pressure to give the crude **SI-5**, which was subjected to the next reaction without further purification.

To a suspension of *t*-BuOK (269 mg, 2.4 mmol) in THF (3 mL) was added a solution of **SI-6**<sup>[9]</sup> (308 mg, 0.89 mmol) in THF (1.5 mL) at -20 °C. The mixture was stirred for 15 min. A solution of **SI-5** (239 mg) in THF (1.5 mL) was added. The mixture was stirred for 1 h, quenched with aq. NH<sub>4</sub>Cl, and extracted with AcOEt (x3). The combined organic layers were washed with brine, dried over anhydrous MgSO<sub>4</sub>, and filtered. The filtrate was concentrated under reduced pressure to give the crude product, which was subjected to the next reaction without further purification.

To a solution of the crude product (395 mg) in THF (6 mL) was added TBAF (2.4 mmol, 1.0 M THF solution) at 0 °C. After stirred for 3 h at room temperature, the mixture was concentrated under reduced pressure. The residue was purified by flash column chromatography on silica gel to give **SI-7** (148 mg, 58%, 3 steps from **SI-4**).

FTIR (neat) 3439, 2966, 2918, 1659, 1447, 1382, 1304, 1146, 1085  $\text{cm}^{-1}$

$^1\text{H}$  NMR (300 MHz,  $\text{CDCl}_3$ ) d 7.84 (d,  $J = 7.3$  Hz, 2 H), 7.63 (t,  $J = 7.3$  Hz, 1 H), 7.51 (t,  $J = 7.3$  Hz, 2 H), 5.14-4.98 (m, 2 H), 4.93 (d,  $J = 10.4$  Hz, 1 H), 4.09 (d,  $J = 10.8$  Hz, 2 H), 3.91 (td,  $J = 10.8, 3.1$  Hz, 1 H), 2.93 (dd,  $J = 13.6, 3.0$  Hz, 1 H), 2.34 (dd,  $J = 13.6, 11.3$  Hz, 1 H), 2.11-1.87 (m, 8 H), 1.68 (s, 3 H), 1.61 (s, 3 H), 1.58 (s, 3 H), 1.48 (s, 3 H), 1.17 (s, 3 H);  $^{13}\text{C}$  NMR (75 MHz,  $\text{CDCl}_3$ ) d 144.8, 138.5, 137.7, 133.2, 131.6, 129.8, 129.0, 128.5, 127.3 (t,  $J = 22.8$  Hz), 123.5, 123.4, 117.0, 63.0, 58.7, 39.5, 37.0, 26.5, 26.1, 25.5, 17.5, 16.2, 16.0, 15.8.

#### (2E,6E,10E)-2-d-3,7,11,15-Tetramethylhexadeca-2,6,10,14-tetraen-1-ol (SI-8)

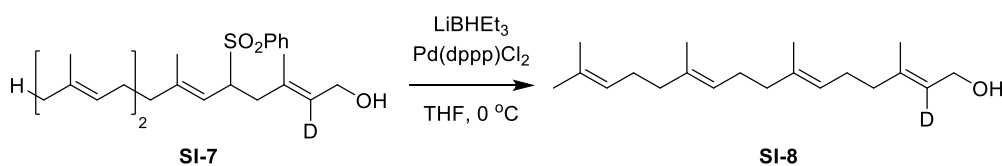

To a solution of **SI-7** (1.81 g, 4.2 mmol) and  $\text{Pd}(\text{dppp})\text{Cl}_2$  (124 mg, 0.21 mmol) in THF (85 mL) was added  $\text{LiBHET}_3$  (21 mmol, 1.0 M THF solution) at 0 °C. The mixture was stirred for 1 h at 0 °C, quenched with aq.  $\text{NH}_4\text{Cl}$ , and extracted with  $\text{AcOEt}$  (x3). The combined organic layers were washed with brine, dried over anhydrous  $\text{MgSO}_4$ , and filtered. The filtrate was concentrated under reduced pressure. The residue was purified by flash column chromatography on silica gel to give **SI-8** (1.14 g, 93%).

FTIR (neat) 3342, 2966, 2925, 2857, 1653, 1438, 1376, 1107, 1006  $\text{cm}^{-1}$

$^1\text{H}$  NMR (300 MHz,  $\text{CDCl}_3$ ) d 5.16-5.05 (m, 3 H), 4.15 (s, 2 H), 2.17-1.92 (m, 12 H), 1.68 (s, 6 H), 1.60 (s, 9 H);  $^{13}\text{C}$  NMR (75 MHz,  $\text{CDCl}_3$ ) d 139.1, 135.2, 134.8, 131.0, 124.3, 124.1, 123.7, 123.0 (t,  $J = 23.4$  Hz), 59.0, 39.59, 39.56, 39.4, 26.6, 26.5, 26.2, 25.6, 25.5, 17.5, 16.1, 15.8

#### (4E)-6-[[t-Butyldiphenylsilyl]oxy]-1-d-4-methylhexa-4-enal (SI-10)

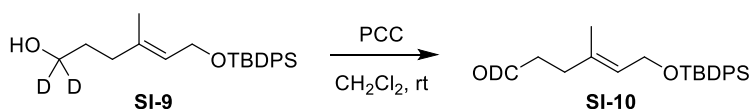

To a solution of **SI-9**<sup>[10]</sup> (7.08 g, 19.1 mmol) in  $\text{CH}_2\text{Cl}_2$  (190 mL) was added PCC (8.23 g, 38.2 mmol) at room temperature. After stirred for 3 h, the suspension was filtered through a celite pad. The filtrate was concentrated under reduced pressure. The residue was purified by flash column chromatography on silica gel to give **SI-10** (5.05 g, 72%).

FTIR (neat) 3072, 2931, 2858, 2072, 1715, 1472, 1428, 1112, 1063  $\text{cm}^{-1}$

$^1\text{H}$  NMR (300 MHz,  $\text{CDCl}_3$ ) d 7.70-7.65 (m, 4 H), 7.46-7.34 (m, 6 H), 5.38 (t,  $J = 6.2$  Hz, 1 H), 4.21 (d,  $J = 6.2$  Hz, 2 H), 2.49 (t,  $J = 7.5$  Hz, 2 H), 2.29 (t,  $J = 7.5$  Hz, 2 H), 1.44 (s, 3 H), 1.04 (s, 9 H),  $^{13}\text{C}$  NMR (75 MHz,  $\text{CDCl}_3$ ) d 201.6 (t,  $J = 25.9$  Hz), 135.5, 134.9, 133.8, 129.5, 127.5, 124.9, 60.9, 41.5 (t,  $J = 3.6$  Hz), 31.3, 26.8, 19.1, 16.3

**(2E,6E)-Ethyl-8-[[*t*-buthyldiphenylsilyl]oxy]-3-*d*-2,6-dimethylocta-2,6-dienoate (SI-11)**

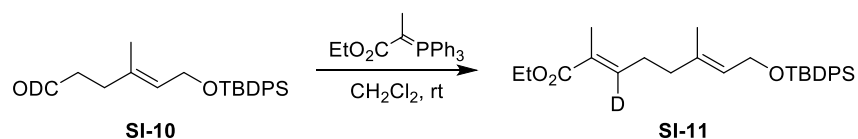

To a solution of **SI-10** (5.04 g, 13.7 mmol) in CH<sub>2</sub>Cl<sub>2</sub> (137 mL) was added ethyl 2-(triphenylphosphoranylidene)propionate (7.43 g, 20.5 mmol) at room temperature. After stirred for 2 h, the mixture was concentrated under reduced pressure. The residue was purified by flash column chromatography on silica gel to give **SI-11** (5.14 g, 83%).

FTIR (neat) 2932, 2858, 1710, 1638, 1428, 1230, 1277, 1196, 1064, 1112, 1064 cm<sup>-1</sup>

<sup>1</sup>H NMR (300 MHz, CDCl<sub>3</sub>) δ 7.71-7.63 (m, 4 H), 7.45-7.34 (m, 6 H), 5.39 (t, *J* = 6.2 Hz, 1 H), 4.25-4.13 (m, 4 H), 2.25 (t, *J* = 7.6 Hz, 2 H), 2.08 (t, *J* = 7.6 Hz, 2 H), 1.83 (s, 3 H), 1.45 (s, 3 H), 1.28 (t, *J* = 7.2 Hz, 3 H), 1.04 (s, 9 H); <sup>13</sup>C NMR (75 MHz, CDCl<sub>3</sub>) δ 168.2, 141.3 (t, *J* = 24.0 Hz), 136.0, 135.7, 134.1, 129.6, 127.7, 124.8, 61.2, 60.5, 38.0, 27.0, 26.9, 19.2, 16.4, 14.4, 12.5.

**(2E,6E)-8-[[*t*-Buthyldiphenylsilyl]oxy]-3-*d*-2,6-dimethylocta-2,6-dien-1-ol (SI-12)**

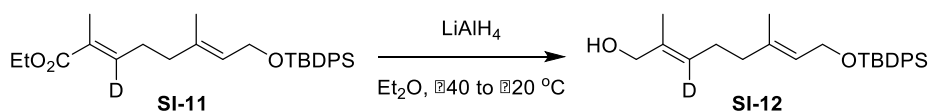

To a suspension of LiAlH<sub>4</sub> (861 mg, 22.7 mmol) in Et<sub>2</sub>O (114 mL) was slowly added a solution of **SI-11** (5.15 g, 11.4 mmol) in Et<sub>2</sub>O at -40 °C. The mixture was stirred for 1 h at -20 °C, quenched with H<sub>2</sub>O (100 mL), acidified with 1N HCl (100 mL), and extracted with Et<sub>2</sub>O (x3). The combined organic layers were washed with brine, dried over anhydrous MgSO<sub>4</sub>, and filtered. The filtrate was concentrated under reduced pressure. The residue was purified by flash column chromatography on silica gel to give **SI-12** (3.27 g, 70%).

FTIR (neat) 3387, 2931, 2858, 1428, 1112, 1066, cm<sup>-1</sup>

<sup>1</sup>H NMR (300 MHz, CDCl<sub>3</sub>) δ 7.72-7.65 (m, 4 H), 7.46-7.34 (m, 6 H), 5.38 (t, *J* = 6.2 Hz, 1 H), 4.22 (d, *J* = 6.4 Hz, 2 H), 3.99 (s, 2 H), 2.12 (t, *J* = 7.6 Hz, 2 H), 2.01 (t, *J* = 7.6 Hz, 2 H), 1.67 (s, 3 H), 1.45 (s, 3 H), 1.04 (s, 9 H); <sup>13</sup>C NMR (75 MHz, CDCl<sub>3</sub>) δ 136.8, 135.6, 134.9, 134.1, 129.6, 127.7, 125.3 (t, *J* = 23.1 Hz), 124.3, 68.8, 61.2, 39.1, 26.9, 25.8, 19.2, 16.4, 13.7.

**(2E,6E,10E)-6-*d*-3,7,11,15-Tetramethyl-9-(phenylsulfonyl)hexadeca-2,6,10,14-tetraen-1-ol (SI-15)**

To a solution of **SI-12** (3.27 g, 7.99 mmol) in CH<sub>2</sub>Cl<sub>2</sub> (80 mL) was added CBr<sub>4</sub> (3.45 g, 10.4 mmol) and PPh<sub>3</sub> (2.73 g, 10.4 mmol) at 0 °C. The mixture was stirred at room temperature for 30 min and filtered to remove insoluble materials. The filtrate was concentrated under reduced pressure to give the crude **SI-13**, which was subjected to the next reaction without further purification.

To a suspension of *t*-BuOK (3.59 g, 32.0 mmol) in THF (40 mL) was added a solution of **SI-14** (3.34 g, 12.0 mmol) in THF (20 mL) at -20 °C. The mixture was stirred for 15 min. A solution of **SI-13** (3.78 g) in THF (20 mL) was added. The mixture was stirred for 1 h, quenched with aq. NH<sub>4</sub>Cl, and extracted with AcOEt (x3). The combined organic

layers were washed with brine, dried over anhydrous  $\text{MgSO}_4$ , and filtered. The filtrate was concentrated under reduced pressure to give the crude product, which was subjected to the next reaction without further purification.

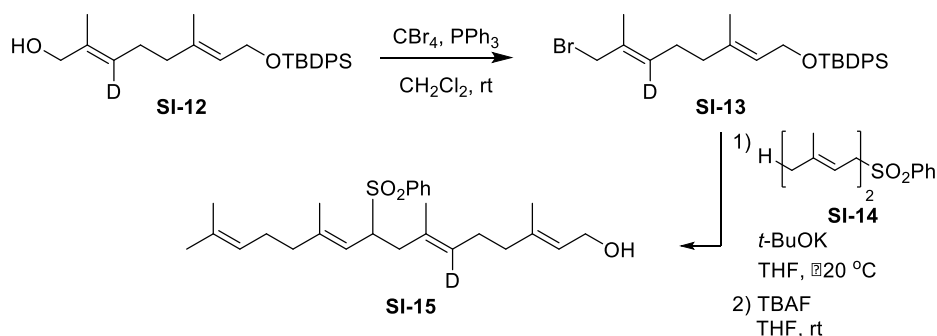

To a solution of the crude product (5.35 g) in THF (80 mL) was added TBAF (32.0 mmol, 1.0 M THF solution) at 0 °C. After stirred for 2 h at room temperature, the mixture was concentrated under reduced pressure. The residue was purified by flash column chromatography on silica gel to give **SI-15** (2.17 g, 63%, 3 steps from **SI-12**).

FTIR (neat) 3437, 2970, 2919, 2856, 1447, 1304. 1145. 1085  $\text{cm}^{-1}$

$^1\text{H}$  NMR (300 MHz,  $\text{CDCl}_3$ ) d 7.84 (d,  $J = 7.3$  Hz, 2 H), 7.62 (t,  $J = 7.3$  Hz, 1 H), 7.51 (t,  $J = 7.3$  Hz, 2 H), 5.37 (t,  $J = 6.7$  Hz, 1 H), 5.02 (m 1 H), 4.90 (d,  $J = 10.8$  Hz 1 H), 4.13 (d,  $J = 6.7$  Hz, 2 H), 3.88 (td,  $J = 11.0, 2.9$  Hz, 1 H), 2.88 (dd,  $J = 13.2, 2.9$  Hz, 1 H), 2.28 (dd,  $J = 13.2, 11.0$  Hz, 1 H), 2.11-1.88 (m, 8 H), 1.68 (s, 3 H), 1.64 (s, 3 H), 1.58 (s, 3 H), 1.53 (s, 3 H), 1.17 (s, 3 H);  $^{13}\text{C}$  NMR (75 MHz,  $\text{CDCl}_3$ ) d 144.8, 138.5, 137.7, 133.2, 131.6, 129.8, 129.0, 128.5, 127.3 (t,  $J = 22.8$  Hz), 123.5, 123.4, 117.0, 63.3, 58.9, 39.4, 38.9, 37.1, 26.04, 26.01, 25.4, 17.4, 16.1, 16.0, 15.7

#### (2E,6E,10E)-6-d-3,7,11,15-Tetramethylhexadeca-2,6,10,14-tetraen-1-ol (**SI-16**)

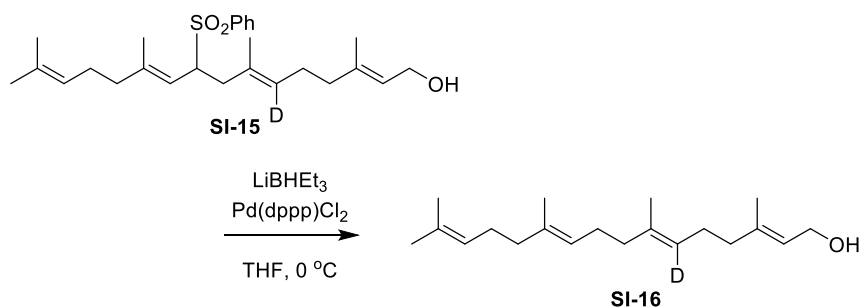

To a solution of **SI-15** (203 mg, 0.47 mmol) and  $\text{Pd(dppp)Cl}_2$  (14 mg, 24 mmol) in THF (5 mL) was added  $\text{LiBHET}_3$  (2.4 mmol, 1.0 M THF solution) at 0 °C. The mixture was stirred for 1 h at 0 °C, quenched with aq.  $\text{NH}_4\text{Cl}$ , and extracted with  $\text{AcOEt}$  (x3). The combined organic layers were washed with brine, dried over anhydrous  $\text{MgSO}_4$ , and filtered. The filtrate was concentrated under reduced pressure. The residue was purified by flash column chromatography on silica gel to give **SI-16** (103 mg, 75%).

FTIR (neat) 3343, 2966, 2919, 2856, 1669, 1447, 1376, 1105, 1001  $\text{cm}^{-1}$

$^1\text{H}$  NMR (300 MHz,  $\text{CDCl}_3$ ) d 5.42 (t,  $J = 7.0$  Hz, 1 H), 5.15-5.06 (m, 2 H), 4.15 (d,  $J = 7.0$  Hz, 2 H), 2.16-1.93 (m, 12 H), 1.68 (s, 6 H), 1.60 (s, 9 H);  $^{13}\text{C}$  NMR (75 MHz,  $\text{CDCl}_3$ ) d 139.7, 135.2, 134.9, 131.1, 124.3, 123.80 (t,  $J = 25.7$  Hz), 123.76, 123.3, 59.2, 39.64, 39.60, 39.5, 26.7, 26.5, 26.4, 26.2, 26.0, 17.6, 16.2, 15.9

**<sup>1</sup>H-NMR data of (a) GGOH, (b) 2D-GGOH, and (c) 6D-GGOH**

**(a) GGOH**

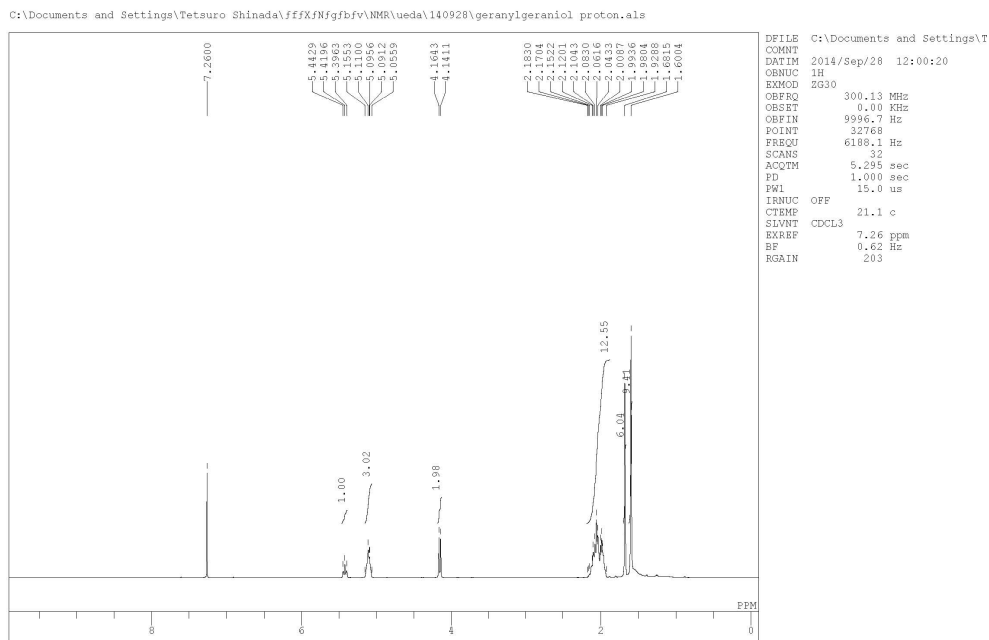

**(b) 2D-GGOH**

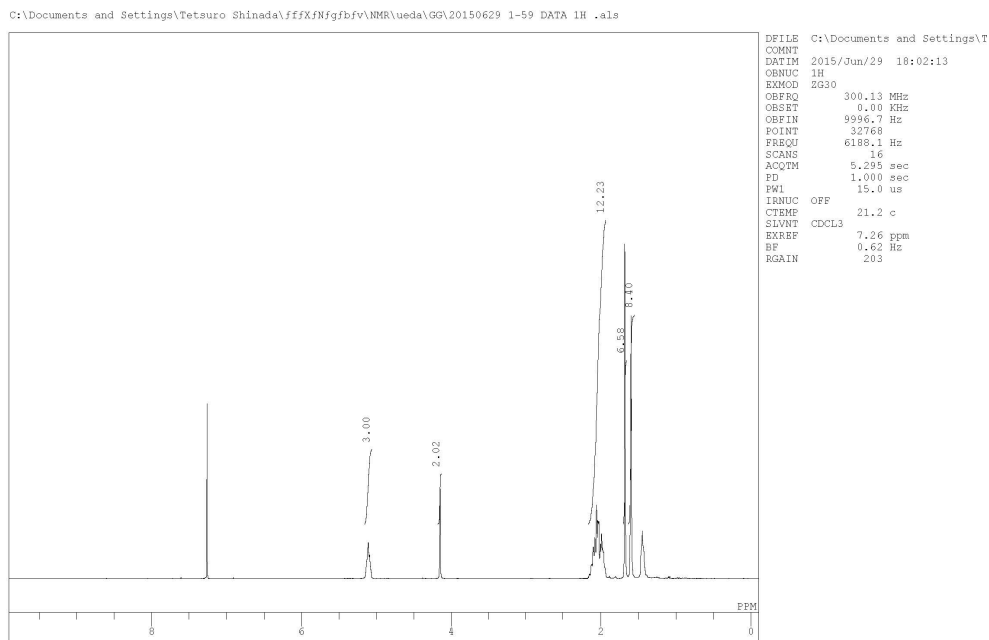

(c) 6D-GGOH

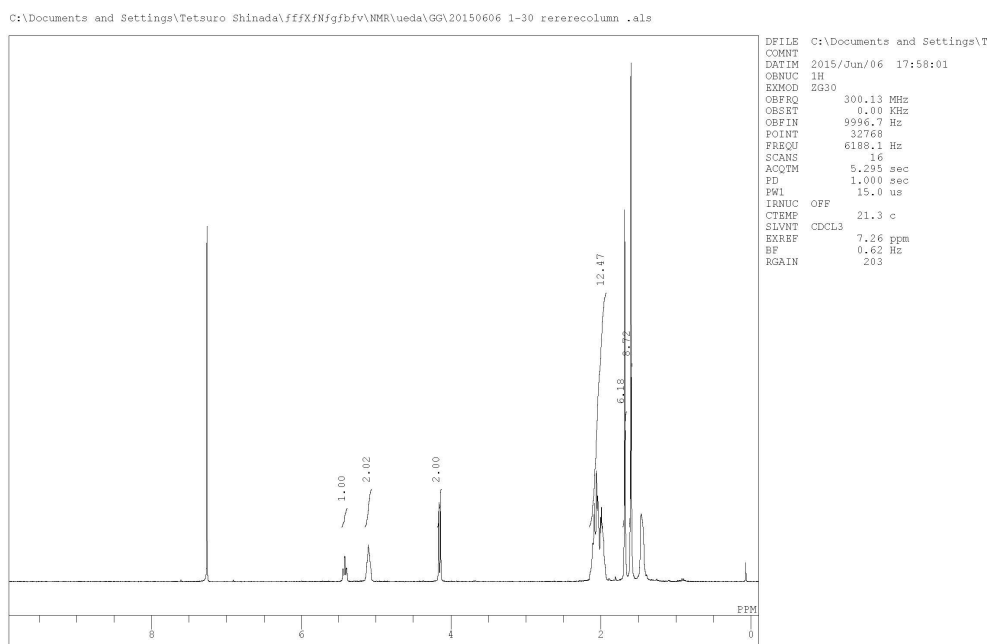

Deuterium Tracing Experiments

(a) Comparison of (3-D)-PD by <sup>1</sup>H NMR spectra with natural abundance PD.<sup>[11]</sup>

natural abundance PD

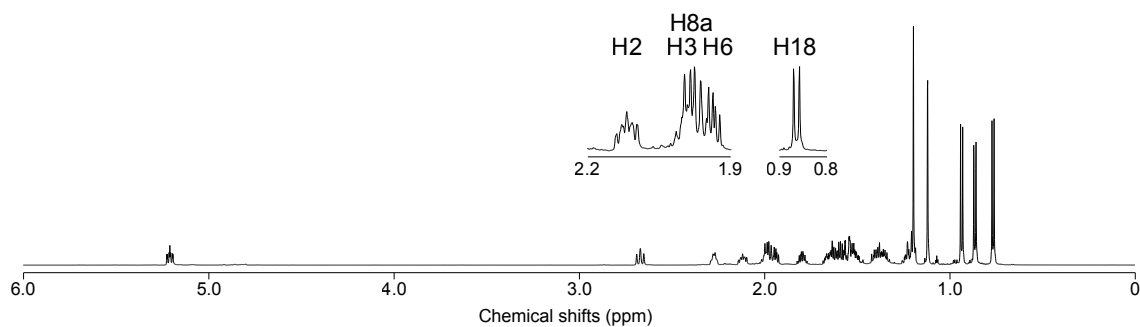

(3-D)-PD

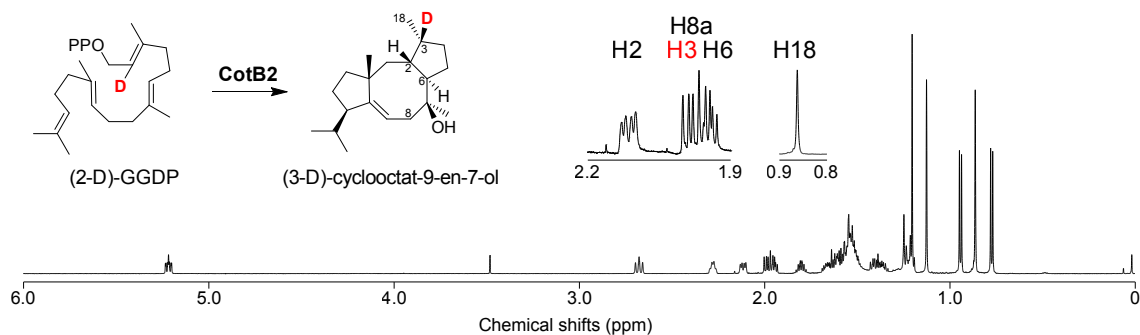

(b) Comparison of (2-D)-PD by  $^1\text{H}$  NMR spectra with natural abundance PD.<sup>[11]</sup>

natural abundance PD

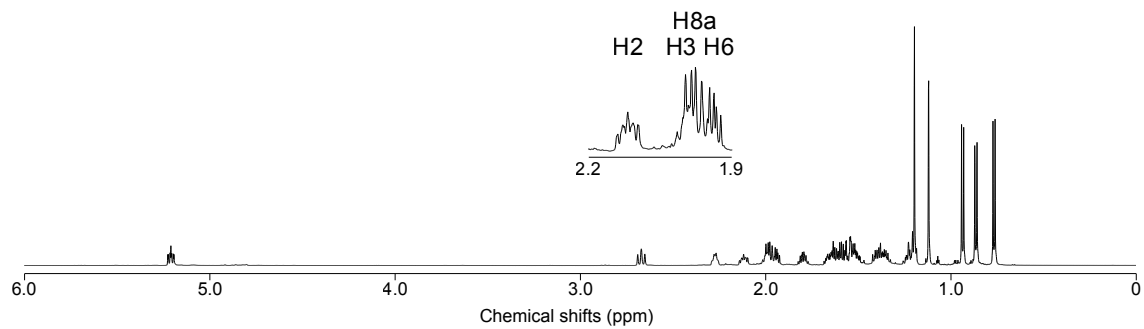

(2-D)-PD

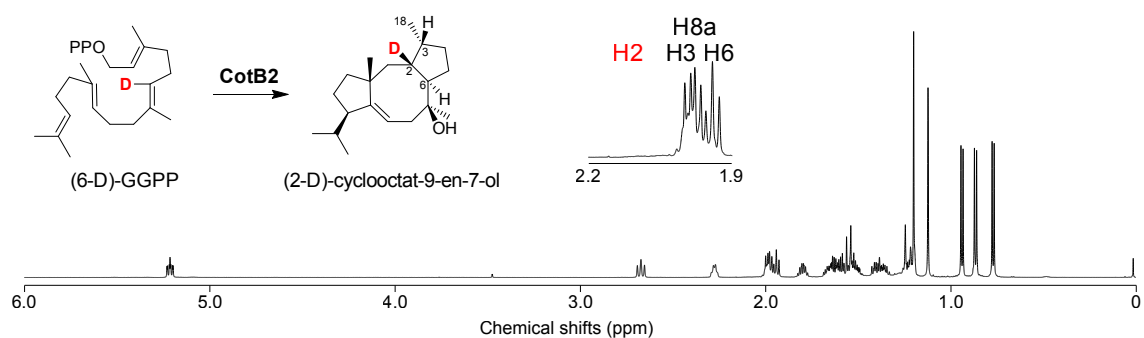

## 5. Reference

1. M. J. Frisch, G. W. Trucks, H. B. Schlegel, G. E. Scuseria, M. A. Robb, J. R. Cheeseman, G. Scalmani, V. Barone, B. Mennucci, G. A. Petersson, H. Nakatsuji, M. Caricato, X. Li, H. P. Hratchian, A. F. Izmaylov, J. Bloino, G. Zheng, J. L. Sonnenberg, M. Hada, M. Ehara, K. Toyota, R. Fukuda, J. Hasegawa, M. Ishida, T. Nakajima, Y. Honda, O. Kitao, H. Nakai, T. Vreven, J. A. Montgomery, Jr., J. E. Peralta, F. Ogliaro, M. Bearpark, J. J. Heyd, E. Brothers, K. N. Kudin, V. N. Staroverov, T. Keith, R. Kobayashi, J. Normand, K. Raghavachari, A. Rendell, J. C. Burant, S. S. Iyengar, J. Tomasi, M. Cossi, N. Rega, J. M. Millam, M. Klene, J. E. Knox, J. B. Cross, V. Bakken, C. Adamo, J. Jaramillo, R. Gomperts, R. E. Stratmann, O. Yazyev, A. J. Austin, R. Cammi, C. Pomelli, J. W. Ochterski, R. L. Martin, K. Morokuma, V. G. Zakrzewski, G. A. Voth, P. Salvador, J. J. Dannenberg, S. Dapprich, A. D. Daniels, O. Farkas, J. B. Foresman, J. V. Ortiz, J. Cioslowski, and D. J. Fox, *Gaussian 09, Revision D.01*, Gaussian, Inc., Wallingford CT, **2013**.
2. Y. Zhao, D. G. Truhlar, *Theor. Chem. Acc.* **2008**, *120*, 215.
3. (a) W. J. Hehre, R. Ditchfield, J. A. Pople, *J. Chem. Phys.* **1972**, *56*, 2257. (b) M. M. Francl, W. J. Pietro, W. J. Hehre, J. S. Binkley, M. S. Gordon, D. J. DeFrees, J. A. Pople, *J. Chem. Phys.* **1982**, *77*, 3654.
4. (a) S. Maeda, Y. Osada, K. Morokuma, K. Ohno, *GRRM 11, Version 11.03*, **2012**. (b) S. Maeda, K. Ohno, K. Morokuma, *Phys. Chem. Chem. Phys.* **2013**, *15*, 3683. (c) K. Ohno, S. Maeda, *Chem. Phys. Lett.*, **2004**, *384*, 277. (d) S. Maeda, K. Ohno, *J. Phys. Chem. A*, **2005**, *109*, 5742. (e) K. Ohno, S. Maeda, *J. Phys. Chem. A*, **2006**, *110*, 8933.
5. The molecular geometries for the transition states were first estimated by Reaction plus software package (Reaction plus, HPC Systems Inc., <http://www.hpc.co.jp/chem/> (written in Japanese)), based on the nudged elastic band (NEB)<sup>6</sup> and string<sup>7</sup> methods, and were re-optimized by Gaussian 09 subsequently.
6. H. Jonsson, G. Mills, K. W. Jacobsen, "Nudged elastic band method for finding minimum energy paths of transitions", in "Classical and Quantum Dynamics in Condensed Phase Simulations", ed. by B. J. Berne, G. Ciccotti, D. F. Coker, p.385 (World Scientific, Singapore, 1998)
7. E. Weinan, W. Ren, E. Vanden-Eijnden, *Phys. Rev. B.*, **2002**, *66*, 052301.
8. H. Nemoto, M. Nagamochi, H. Ishibashi, K. Hukumoto, *J. Org. Chem.* **1994**, *59*, 74.
9. (a) S. Bouzbouz, B. Kirschleger, *Synlett* **1994**, 763. (b) C. Tsangarakis, M. Stratakis, *Eur. J. Org. Chem.* **2006**, 4435.
10. C. A. Citron, P. Rabe, L. Barra, C. Nakano, T. Hoshino, J. S. Dickschat, *Eur. J. Org. Chem.* **2014**, 7684.
11. A. Meguro, Y. Motoyoshi, K. Teramoto, S. Ueda, Y. Totsuka, Y. Ando, T. Tomita, S-Y. Kim, T. Kimura, M. Igarashi, R. Sawa, T. Shinada, M. Nishiyama, T. Kuzuyama. *Angew. Chem. Int. Ed.* **2015**, *54*, 4353.
